# Supplementary material
Source: publisher figshare collection journal article supplement (https://gsajournals.figshare.com/articles/dataset/_/14787438)
Supplement: Supplementary file 1 [file 1]

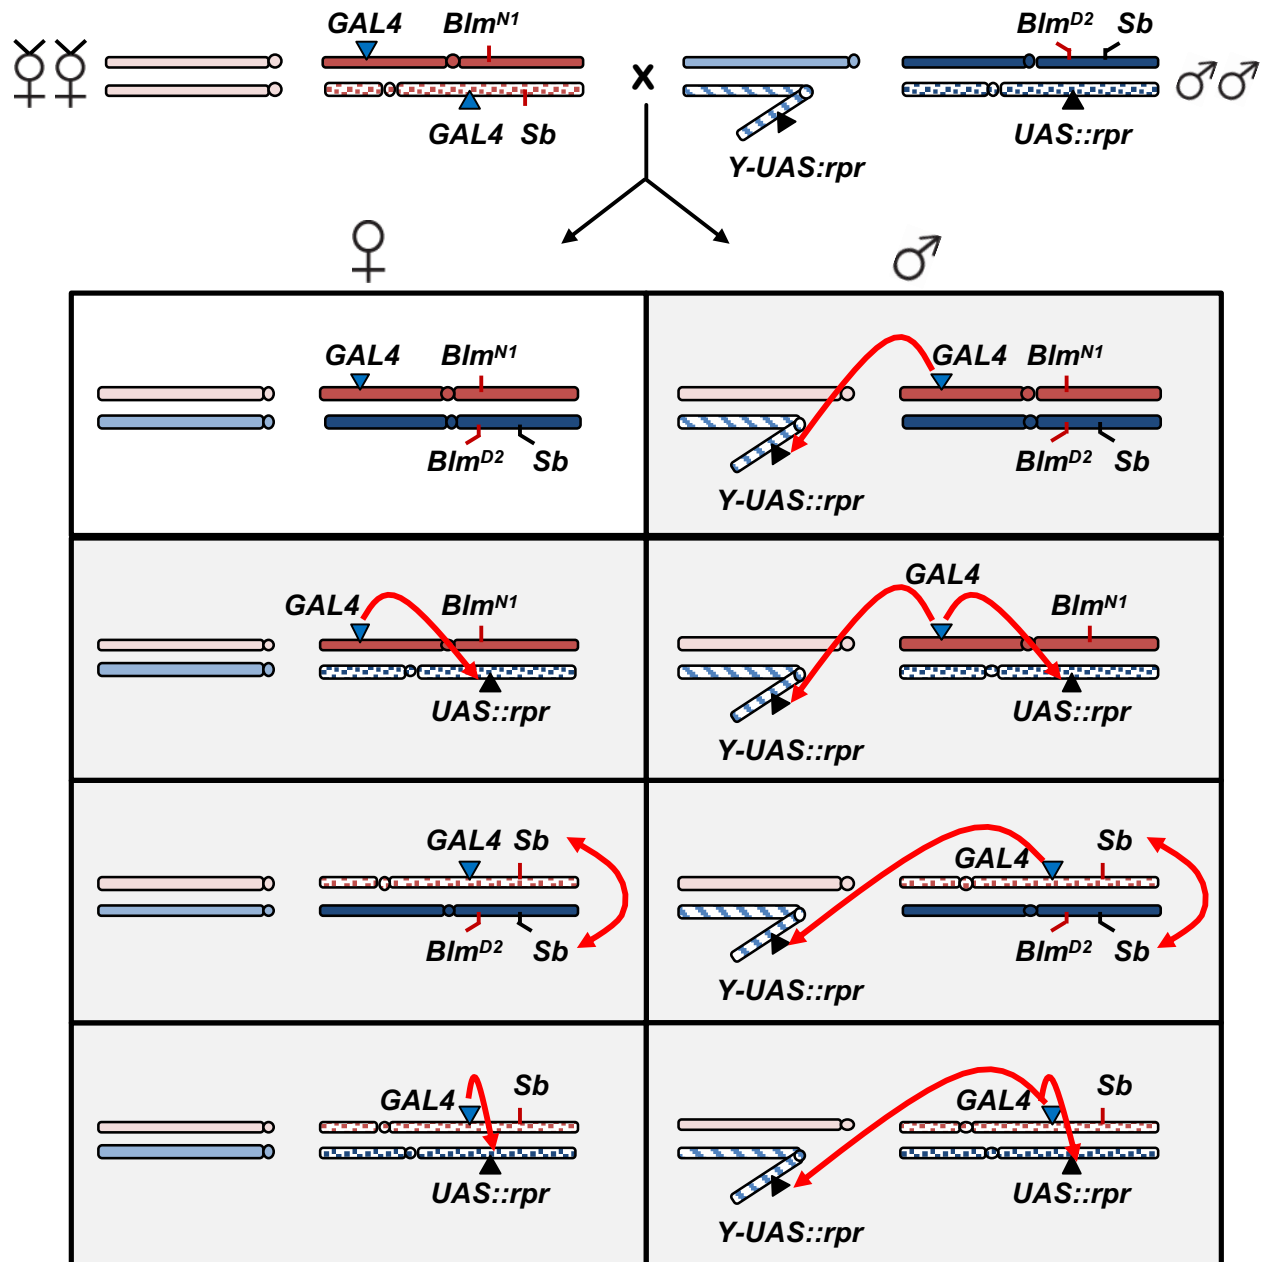

**Figure S1: Cross scheme for collecting large numbers of *Blm* mutant mothers.** Due to the severe maternal-effect lethality observed in *Blm* females, (90-95% of embryos from *Blm* mothers fail to hatch) we used a scheme to make it easier to collect large numbers of *Blm* mothers, which makes it possible to produce sufficient numbers of progeny in order to carry out our experiments. We utilized the following cross, based on a similar scheme from McMahan et. al (2013) to achieve

this aim. Virgin female flies containing the *Blm<sup>N1</sup>* null allele were crossed to male flies containing the *Blm<sup>D2</sup>* null allele, both of which were maintained over a balancer chromosome to prevent recombination. Most of the progeny classes from this cross inherit the yeast transcriptional activator GAL4 as well as the GAL4 DNA recognition sequence, UAS, attached to the pro-apoptotic gene *rpr* (this includes all classes of male flies, which inherit the UAS::*rpr* construct on the Y chromosome). The combination of the GAL4 and UAS::*rpr* genetic elements in the same cell activates expression of Rpr and is lethal (Wang *et al.* 1999). One additional progeny class inherits two copies of the *Stubble (Sb)* allele, which is lethal. Shaded boxes indicate a genotype class of flies that does not survive. Only female progeny inheriting both the *Blm<sup>N1</sup>* and the *Blm<sup>D2</sup>* alleles survive (white box). Red arrows indicate the cause of lethality in each class of flies, where applicable.

**Table S1: Statistical Results from Figure 2**

| Tests for normal distribution                                                           |                              |                    |            |
|-----------------------------------------------------------------------------------------|------------------------------|--------------------|------------|
| Cross                                                                                   | Shapiro Wilks test statistic |                    | p-value    |
| <i>Blm</i> <sup>+</sup> x <i>w</i> <sup>I118</sup>                                      | 0.95794                      |                    | 0.2921     |
| <i>Blm</i> <sup>+</sup> x <i>C</i> (1; <i>Y</i> )3/O                                    | 0.97992                      |                    | 0.9414     |
| <i>Blm</i> <sup>+</sup> x <i>C</i> (1; <i>Y</i> )6/ <i>Y</i>                            | 0.99062                      |                    | 0.9672     |
| <i>Blm</i> <sup>+</sup> x <i>Dp</i> (1; <i>Y</i> ) <i>B</i> <sup>S</sup>                | 0.93479                      |                    | 0.09062    |
| <i>Blm</i> <sup>+</sup> x <i>Dp</i> (1; <i>Y</i> ) <i>y</i> <sup>+</sup>                | 0.88919                      |                    | 0.004615*  |
| <i>Blm</i> <sup>+</sup> x <i>In</i> (1) <i>sc</i> <sup>4L</sup> <i>sc</i> <sup>8R</sup> | 0.97212                      |                    | 0.8544     |
| <i>Blm</i> x <i>w</i> <sup>I118</sup>                                                   | 0.90824                      |                    | 0.0008018* |
| <i>Blm</i> x <i>C</i> (1; <i>Y</i> )3/O                                                 | 0.77813                      |                    | < 0.0001*  |
| <i>Blm</i> x <i>C</i> (1; <i>Y</i> )6/ <i>Y</i>                                         | 0.8243                       |                    | < 0.0001*  |
| <i>Blm</i> x <i>Dp</i> (1; <i>Y</i> ) <i>B</i> <sup>S</sup>                             | 0.96559                      |                    | 0.008321*  |
| <i>Blm</i> x <i>Dp</i> (1; <i>Y</i> ) <i>y</i> <sup>+</sup>                             | 0.98927                      |                    | 0.6342     |
| <i>Blm</i> x <i>In</i> (1) <i>sc</i> <sup>4L</sup> <i>sc</i> <sup>8R</sup>              | 0.9737                       |                    | 0.02033    |
| t-tests comparing observed proportion of female progeny to expected (0.5)               |                              |                    |            |
| Cross                                                                                   | t-statistic                  | Degrees of freedom | p-value    |
| <i>Blm</i> <sup>+</sup> x <i>w</i> <sup>I118</sup>                                      | 0.10861                      | 28                 | 0.9143     |
| <i>Blm</i> <sup>+</sup> x <i>C</i> (1; <i>Y</i> )3/O                                    | 2.707                        | 18                 | 0.01444    |
| <i>Blm</i> <sup>+</sup> x <i>C</i> (1; <i>Y</i> )6/ <i>Y</i>                            | 1.6151                       | 46                 | 0.1131     |
| <i>Blm</i> <sup>+</sup> x <i>Dp</i> (1; <i>Y</i> ) <i>B</i> <sup>S</sup>                | 2.7044                       | 26                 | 0.01191    |
| <i>Blm</i> <sup>+</sup> x <i>Dp</i> (1; <i>Y</i> ) <i>y</i> <sup>+</sup>                | 0.16313                      | 29                 | 0.8715     |
| <i>Blm</i> <sup>+</sup> x <i>In</i> (1) <i>sc</i> <sup>4L</sup> <i>sc</i> <sup>8R</sup> | 2.0157                       | 16                 | 0.06095    |
| <i>Blm</i> <sup>-</sup> x <i>w</i> <sup>I118</sup>                                      | 13.041                       | 50                 | < 0.0001   |
| <i>Blm</i> <sup>-</sup> x <i>C</i> (1; <i>Y</i> )3/O                                    | 35.02                        | 106                | < 0.0001   |
| <i>Blm</i> <sup>-</sup> x <i>C</i> (1; <i>Y</i> )6/ <i>Y</i>                            | 67.759                       | 106                | < 0.0001   |
| <i>Blm</i> <sup>-</sup> x <i>Dp</i> (1; <i>Y</i> ) <i>B</i> <sup>S</sup>                | 42.147                       | 103                | < 0.0001   |

|                                                                           |                    |                           |                |
|---------------------------------------------------------------------------|--------------------|---------------------------|----------------|
| $Blm^- \times Dp(1;Y)y^+$                                                 | 36.013             | 95                        | < 0.0001       |
| $Blm^- \times In(1)sc^{4L}sc^{8R}$                                        | 29.125             | 117                       | < 0.0001       |
| <b>t-tests comparing observed proportions of female progeny</b>           |                    |                           |                |
| <b>Cross comparisons</b>                                                  | <b>t-statistic</b> | <b>Degrees of freedom</b> | <b>p-value</b> |
| $Blm^+ \times w^{1118}$ vs. $Blm^- \times w^{1118}$                       | 11.49              | 71.706                    | < 0.0001       |
| $Blm^+ \times C(1;Y)3/O$ vs. $Blm^- \times C(1;Y)3/O$                     | 40.441             | 93.376                    | < 0.0001       |
| $Blm^+ \times C(1;Y)6/Y$ vs. $Blm^- \times C(1;Y)6/Y$                     | 18.418             | 40.202                    | < 0.0001       |
| $Blm^+ \times Dp(1;Y)B^S$ vs. $Blm^- \times Dp(1;Y)B^S$                   | 29.49              | 93.556                    | < 0.0001       |
| $Blm^+ \times Dp(1;Y)y^+$ vs. $Blm^- \times Dp(1;Y)y^+$                   | 21.624             | 63.984                    | < 0.0001       |
| $Blm^+ \times In(1)sc^{4L}sc^{8R}$ vs. $Blm^- \times In(1)sc^{4L}sc^{8R}$ | 11.705             | 25.674                    | < 0.0001       |
| $Blm^- \times w^{1118}$ vs. $Blm^- \times In(1)sc^{4L}sc^{8R}$            | 2.6689             | 81.915                    | 0.009172       |
| $Blm^- \times w^{1118}$ vs. $Blm^- \times Dp(1;Y)y^+$                     | 5.1182             | 77.964                    | < 0.0001       |
| $Blm^- \times w^{1118}$ vs. $Blm^- \times Dp(1;Y)B^S$                     | 8.0738             | 78.557                    | < 0.0001       |

**Table S2: Statistical Results from Figure 3**

| <b>Tests for female proportion throughout development</b>       |                         |                |
|-----------------------------------------------------------------|-------------------------|----------------|
| <b>Comparison</b>                                               | <b>z-test statistic</b> | <b>p-value</b> |
| Embryo vs. 1 <sup>st</sup> instar larvae                        | 3.1416                  | 0.00168        |
| Embryo vs. 3 <sup>rd</sup> instar larvae                        | 3.7332                  | 0.0002         |
| Embryo vs. adult                                                | 3.7191                  | 0.0002         |
| 1 <sup>st</sup> instar larvae vs. 3 <sup>rd</sup> instar larvae | 1.0314                  | 0.30302        |
| 1 <sup>st</sup> instar larvae vs. adult                         | 1.0338                  | 0.30302        |
| 3 <sup>rd</sup> instar larvae vs. adult                         | 0.0164                  | 0.98404        |

**Table S3: Statistical Results from Figure 5**

| Test for normal distribution of data                                                |                              |                       |          |
|-------------------------------------------------------------------------------------|------------------------------|-----------------------|----------|
| Data Set                                                                            | Shapiro Wilks test statistic | p-value               |          |
| $w^{1118}$ fathers ( $Blm^+$ , $Blm^-$ , and $Blm^{N2}$ mothers)                    | 0.97998                      | 0.06055               |          |
| $B^SY$ fathers ( $Blm^+$ , $Blm^-$ , and $Blm^{N2}$ mothers)                        | 0.90465                      | < 0.0001 <sup>#</sup> |          |
| $C(I:Y)6$ fathers ( $Blm^+$ , $Blm^-$ , and $Blm^{N2}$ mothers)                     | 0.86422                      | < 0.0001*             |          |
| Tests for differences in proportion of females based on maternal genetic background |                              |                       |          |
| Data Set                                                                            | ANOVA test statistic         | df                    | p-value  |
| $w^{1118}$ fathers ( $Blm^+$ , $Blm^-$ , and $Blm^{N2}$ mothers)                    | 68.095                       | 2                     | < 0.0001 |
| $B^SY$ fathers ( $Blm^+$ , $Blm^-$ , and $Blm^{N2}$ mothers)                        | 404.85                       | 2                     | < 0.0001 |
| $C(I:Y)6$ fathers ( $Blm^+$ , $Blm^-$ , and $Blm^{N2}$ mothers)                     | 786.62                       | 2                     | < 0.0001 |
| Post-hoc comparisons of proportion female                                           |                              |                       |          |

| Comparison                                                                                                                    | t-statistic           | df       | p-value  |
|-------------------------------------------------------------------------------------------------------------------------------|-----------------------|----------|----------|
| $Blm^- \times w^{1118}$ vs. $Blm^{N2} \times w^{1118}$                                                                        | 8.879                 | 122      | < 0.0001 |
| $Blm^- \times w^{1118}$ vs. $Blm^+ \times w^{1118}$                                                                           | 10.560                | 122      | < 0.0001 |
| $Blm^+ \times w^{1118}$ vs. $Blm^{N2} \times w^{1118}$                                                                        | 2.687                 | 122      | 0.0222   |
| $Blm^- \times B^SY$ vs. $Blm^{N2} \times B^SY$                                                                                | 23.568                | 166      | < 0.0001 |
| $Blm^- \times B^SY$ vs. $Blm^+ \times B^SY$                                                                                   | 21.035                | 166      | < 0.0001 |
| $Blm^+ \times B^SY$ vs. $Blm^{N2} \times B^SY$                                                                                | 0.302                 | 166      | 0.9511   |
| $Blm^- \times C(1:Y)6$ vs. $Blm^{N2} \times C(1:Y)6$                                                                          | 24.778                | 190      | < 0.0001 |
| $Blm^- \times C(1:Y)6$ vs. $Blm^+ \times C(1:Y)6$                                                                             | 36.758                | 190      | < 0.0001 |
| $Blm^+ \times C(1:Y)6$ vs. $Blm^{N2} \times C(1:Y)6$                                                                          | 8.300                 | 190      | < 0.0001 |
| <p># Nonparametric tests due to non-normally distributed data</p> <p>*sample size &gt;30, so parametric tests appropriate</p> |                       |          |          |
| Data Set                                                                                                                      | Kruskal-Wallis result | df       | p-value  |
| $B^SY$ fathers ( $Blm^+$ , $Blm^-$ , and $Blm^{N2}$ mothers)                                                                  | 119.04                | 2        | < 0.0001 |
| Post-hoc comparisons of proportion female                                                                                     |                       |          |          |
| Comparison                                                                                                                    | Wilcoxon ran sum test | p-value  |          |
| $Blm^- \times B^SY$ vs. $Blm^{N2} \times B^SY$                                                                                | 3947                  | < 0.0001 |          |
| $Blm^- \times B^SY$ vs. $Blm^+ \times B^SY$                                                                                   | 2808                  | < 0.0001 |          |
| $Blm^+ \times B^SY$ vs. $Blm^{N2} \times B^SY$                                                                                | 525                   | 0.8783   |          |

**Table S4: Statistical Results from Figure 6**

| Test for normal distribution of data                                                                    |                              |                        |          |
|---------------------------------------------------------------------------------------------------------|------------------------------|------------------------|----------|
| Data Set                                                                                                | Shapiro Wilks test statistic | p-value                |          |
| $w^{1118}$ fathers ( $Blm^+$ , $Blm^-$ , $Blm^+ pol\alpha^{+/-}$ , and $Blm^- pol\alpha^{+/-}$ mothers) | 0.95725                      | 0.0001305 <sup>#</sup> |          |
| $C(1:Y)6$ fathers ( $Blm^+$ , $Blm^-$ , $Blm^+ pol\alpha^{+/-}$ , and $Blm^- pol\alpha^{+/-}$ mothers)  | 0.77936                      | < 0.0001 <sup>#</sup>  |          |
| Parametric tests for differences in proportion of females based on maternal genetic background          |                              |                        |          |
| Data Set                                                                                                | ANOVA test statistic         | df                     | p-value  |
| $w^{1118}$ fathers ( $Blm^+$ , $Blm^-$ , $Blm^+ pol\alpha^{+/-}$ , and $Blm^- pol\alpha^{+/-}$ mothers) | 88.328                       | 3                      | < 0.0001 |
| $C(1:Y)6$ fathers ( $Blm^+$ , $Blm^-$ , $Blm^+ pol\alpha^{+/-}$ , and $Blm^- pol\alpha^{+/-}$ mothers)  | 915.24                       | 3                      | < 0.0001 |
| Nonparametric post-hoc comparisons of proportion female                                                 |                              |                        |          |
| Comparison                                                                                              | t-statistic                  | df                     | p-value  |
| $Blm^- \times w^{1118}$ vs. $Blm^+ \times w^{1118}$                                                     | 11.247                       | 147                    | < 0.0001 |
| $Blm^- \times w^{1118}$ vs. $Blm^+ pol\alpha^{+/-} \times w^{1118}$                                     | 10.142                       | 147                    | < 0.0001 |
| $Blm^- \times w^{1118}$ vs. $Blm^- pol\alpha^{+/-} \times w^{1118}$                                     | 1.979                        | 147                    | 0.2006   |
| $Blm^+ pol\alpha^{+/-} \times w^{1118}$ vs. $Blm^- pol\alpha^{+/-} \times w^{1118}$                     | 11.585                       | 147                    | < 0.0001 |
| $Blm^+ pol\alpha^{+/-} \times w^{1118}$ vs. $Blm^+ \times w^{1118}$                                     | 0.512                        | 147                    | 0.9561   |
| $Blm^- pol\alpha^{+/-} \times w^{1118}$ vs. $Blm^+ \times w^{1118}$                                     | 12.729                       | 147                    | < 0.0001 |
| $Blm^- \times C(1:Y)6$ vs. $Blm^+ \times C(1:Y)6$                                                       | 43.319                       | 212                    | < 0.0001 |

|                                                                                                         |                              |                |                |
|---------------------------------------------------------------------------------------------------------|------------------------------|----------------|----------------|
| $Blm^- \times C(1:Y)6$ vs. $Blm^+ pol\alpha^{+/-} \times C(1:Y)6$                                       | 26.736                       | 212            | < 0.0001       |
| $Blm^- \times C(1:Y)6$ vs. $Blm^- pol\alpha^{+/-} \times C(1:Y)6$                                       | 6.193                        | 212            | < 0.0001       |
| $Blm^+ pol\alpha^{+/-} \times C(1:Y)6$ vs. $Blm^- pol\alpha^{+/-} \times C(1:Y)6$                       | 28.386                       | 212            | < 0.0001       |
| $Blm^+ pol\alpha^{+/-} \times C(1:Y)6$ vs. $Blm^+ \times C(1:Y)6$                                       | 2.119                        | 212            | 0.1504         |
| $Blm^- pol\alpha^{+/-} \times C(1:Y)6$ vs. $Blm^+ \times C(1:Y)6$                                       | 41.622                       | 212            | < 0.0001       |
| <b># Nonparametric tests due to non-normally distributed data</b>                                       |                              |                |                |
| <b>Data Set</b>                                                                                         | <b>Kruskal-Wallis result</b> | <b>df</b>      | <b>p-value</b> |
| $w^{1118}$ fathers ( $Blm^+$ , $Blm^-$ , $Blm^+ pol\alpha^{+/-}$ , and $Blm^- pol\alpha^{+/-}$ mothers) | 92.01                        | 3              | < 0.0001       |
| $C(1:Y)6$ fathers ( $Blm^+$ , $Blm^-$ , $Blm^+ pol\alpha^{+/-}$ , and $Blm^- pol\alpha^{+/-}$ mothers)  | 153.33                       | 3              | < 0.0001       |
| <b>Nonparametric post-hoc comparisons of proportion female</b>                                          |                              |                |                |
| <b>Comparison</b>                                                                                       | <b>Wilcoxon ran sum test</b> | <b>p-value</b> |                |
| $Blm^- \times w^{1118}$ vs. $Blm^+ \times w^{1118}$                                                     | 1397                         | < 0.0001       |                |
| $Blm^- \times w^{1118}$ vs. $Blm^+ pol\alpha^{+/-} \times w^{1118}$                                     | 1189                         | < 0.0001       |                |
| $Blm^- \times w^{1118}$ vs. $Blm^- pol\alpha^{+/-} \times w^{1118}$                                     | 959.5                        | 0.1238         |                |
| $Blm^+ pol\alpha^{+/-} \times w^{1118}$ vs. $Blm^- pol\alpha^{+/-} \times w^{1118}$                     | 6                            | < 0.0001       |                |
| $Blm^+ pol\alpha^{+/-} \times w^{1118}$ vs. $Blm^+ \times w^{1118}$                                     | 397                          | 0.5553         |                |
| $Blm^- pol\alpha^{+/-} \times w^{1118}$ vs. $Blm^+ \times w^{1118}$                                     | 1334                         | < 0.0001       |                |
| $Blm^- \times C(1:Y)6$ vs. $Blm^+ \times C(1:Y)6$                                                       | 0.5                          | < 0.0001       |                |



|                                                                                   |       |          |
|-----------------------------------------------------------------------------------|-------|----------|
| $Blm^- \times C(1:Y)6$ vs. $Blm^+ pol\alpha^{+/-} \times C(1:Y)6$                 | 1     | < 0.0001 |
| $Blm^- \times C(1:Y)6$ vs. $Blm^- pol\alpha^{+/-} \times C(1:Y)6$                 | 3902  | < 0.0001 |
| $Blm^+ pol\alpha^{+/-} \times C(1:Y)6$ vs. $Blm^- pol\alpha^{+/-} \times C(1:Y)6$ | 765   | < 0.0001 |
| $Blm^+ pol\alpha^{+/-} \times C(1:Y)6$ vs. $Blm^+ \times C(1:Y)6$                 | 289.5 | 0.096    |
| $Blm^- pol\alpha^{+/-} \times C(1:Y)6$ vs. $Blm^+ \times C(1:Y)6$                 | 0     | < 0.0001 |
