# Supplementary material
Source: publisher figshare collection journal article supplement (https://gsajournals.figshare.com/articles/dataset/_/14787438)
Supplement: Supplementary file 1 [file 1]

## Sheet: Figures 2,5,6 data
Background	Cross	BackCross	Vial	propfemale	propmale	Total
w1118	w1118	w1118w1118	1	0.435	0.565	124
w1118	w1118	w1118w1118	2	0.489	0.511	94
w1118	w1118	w1118w1118	3	0.472	0.528	89
w1118	w1118	w1118w1118	4	0.482	0.518	141
w1118	w1118	w1118w1118	5	0.526	0.474	116
w1118	w1118	w1118w1118	6	0.55	0.45	111
w1118	w1118	w1118w1118	7	0.561	0.439	155
w1118	w1118	w1118w1118	8	0.573	0.427	96
w1118	w1118	w1118w1118	9	0.549	0.451	142
w1118	w1118	w1118w1118	10	0.514	0.486	109
w1118	w1118	w1118w1118	11	0.577	0.423	149
w1118	w1118	w1118w1118	12	0.508	0.492	128
w1118	w1118	w1118w1118	13	0.435	0.565	138
w1118	w1118	w1118w1118	14	0.5	0.5	130
w1118	w1118	w1118w1118	15	0.442	0.558	147
w1118	w1118	w1118w1118	16	0.515	0.485	132
w1118	w1118	w1118w1118	17	0.529	0.471	85
w1118	w1118	w1118w1118	18	0.42	0.58	143
w1118	w1118	w1118w1118	19	0.476	0.524	126
w1118	w1118	w1118w1118	20	0.445	0.555	146
w1118	w1118	w1118w1118	21	0.548	0.452	146
w1118	w1118	w1118w1118	22	0.479	0.521	94
w1118	w1118	w1118w1118	23	0.456	0.544	90
w1118	w1118	w1118w1118	24	0.564	0.436	117
w1118	w1118	w1118w1118	25	0.52	0.48	127
w1118	w1118	w1118w1118	26	0.487	0.513	150
w1118	w1118	w1118w1118	27	0.442	0.558	77
w1118	w1118	w1118w1118	28	0.489	0.511	137
w1118	w1118	w1118w1118	29	0.544	0.456	125
w1118	In(1)	w1118ln(1)	1	0.525	0.475	120
w1118	In(1)	w1118ln(1)	2	0.462	0.538	130
w1118	In(1)	w1118ln(1)	3	0.404	0.596	52
w1118	In(1)	w1118ln(1)	4	0.417	0.583	36
w1118	In(1)	w1118ln(1)	5	0.6	0.4	70
w1118	In(1)	w1118ln(1)	6	0.651	0.349	109
w1118	In(1)	w1118ln(1)	7	0.583	0.417	48
w1118	In(1)	w1118ln(1)	8	0.486	0.514	148
w1118	In(1)	w1118ln(1)	9	0.582	0.418	134
w1118	In(1)	w1118ln(1)	10	0.481	0.519	27
w1118	In(1)	w1118ln(1)	11	0.561	0.439	123
w1118	In(1)	w1118ln(1)	12	0.524	0.476	103
w1118	In(1)	w1118ln(1)	13	0.574	0.426	141
w1118	In(1)	w1118ln(1)	14	0.652	0.348	112
w1118	In(1)	w1118ln(1)	15	0.537	0.463	134
w1118	In(1)	w1118ln(1)	16	0.511	0.489	135
w1118	In(1)	w1118ln(1)	17	0.54	0.46	124
w1118	y+Y	w1118y+Y	1	0.492	0.508	59
w1118	y+Y	w1118y+Y	2	0.5	0.5	68
w1118	y+Y	w1118y+Y	3	0.381	0.619	21
w1118	y+Y	w1118y+Y	4	0.567	0.433	67
w1118	y+Y	w1118y+Y	5	0.457	0.543	81
w1118	y+Y	w1118y+Y	6	0.519	0.481	77
w1118	y+Y	w1118y+Y	7	0.581	0.419	62
w1118	y+Y	w1118y+Y	8	0.585	0.415	53
w1118	y+Y	w1118y+Y	9	0.469	0.531	64
w1118	y+Y	w1118y+Y	10	0.527	0.473	55
w1118	y+Y	w1118y+Y	11	0.476	0.524	103
w1118	y+Y	w1118y+Y	12	0.508	0.492	122
w1118	y+Y	w1118y+Y	13	0.533	0.467	90
w1118	y+Y	w1118y+Y	14	0.558	0.442	113
w1118	y+Y	w1118y+Y	15	0.533	0.467	60
w1118	y+Y	w1118y+Y	16	0.361	0.639	36
w1118	y+Y	w1118y+Y	17	0.512	0.488	121
w1118	y+Y	w1118y+Y	18	0.548	0.452	62
w1118	y+Y	w1118y+Y	19	0.524	0.476	124
w1118	y+Y	w1118y+Y	20	0.468	0.532	139
w1118	y+Y	w1118y+Y	21	0.39	0.61	118
w1118	y+Y	w1118y+Y	22	0.549	0.451	113
w1118	y+Y	w1118y+Y	23	0.516	0.484	91
w1118	y+Y	w1118y+Y	24	0.551	0.449	107
w1118	y+Y	w1118y+Y	25	0.522	0.478	161
w1118	y+Y	w1118y+Y	26	0.537	0.463	136
w1118	y+Y	w1118y+Y	27	0.5	0.5	120
w1118	y+Y	w1118y+Y	28	0.366	0.634	112
w1118	y+Y	w1118y+Y	29	0.397	0.603	116
w1118	y+Y	w1118y+Y	30	0.517	0.483	118
w1118	BSY	w1118BSY	1	0.454	0.546	119
w1118	BSY	w1118BSY	2	0.49	0.51	145
w1118	BSY	w1118BSY	3	0.541	0.459	133
w1118	BSY	w1118BSY	4	0.496	0.504	121
w1118	BSY	w1118BSY	5	0.503	0.497	153
w1118	BSY	w1118BSY	6	0.568	0.432	148
w1118	BSY	w1118BSY	7	0.522	0.478	138
w1118	BSY	w1118BSY	8	0.56	0.44	159
w1118	BSY	w1118BSY	9	0.537	0.463	67
w1118	BSY	w1118BSY	10	0.52	0.48	171
w1118	BSY	w1118BSY	11	0.564	0.436	165
w1118	BSY	w1118BSY	12	0.531	0.469	147
w1118	BSY	w1118BSY	13	0.527	0.473	184
w1118	BSY	w1118BSY	14	0.492	0.508	191
w1118	BSY	w1118BSY	15	0.529	0.471	172
w1118	BSY	w1118BSY	16	0.529	0.471	174
w1118	BSY	w1118BSY	17	0.576	0.424	99
w1118	BSY	w1118BSY	18	0.504	0.496	137
w1118	BSY	w1118BSY	19	0.559	0.441	118
w1118	BSY	w1118BSY	20	0.566	0.434	106
w1118	BSY	w1118BSY	21	0.553	0.447	103
w1118	BSY	w1118BSY	22	0.46	0.54	137
w1118	BSY	w1118BSY	23	0.523	0.477	130
w1118	BSY	w1118BSY	24	0.443	0.557	140
w1118	BSY	w1118BSY	25	0.431	0.569	102
w1118	BSY	w1118BSY	26	0.57	0.43	121
w1118	BSY	w1118BSY	27	0.516	0.484	122
w1118	C(1;Y)3	w1118C(1;Y)3	1	0.423	0.577	104
w1118	C(1;Y)3	w1118C(1;Y)3	2	0.318	0.682	151
w1118	C(1;Y)3	w1118C(1;Y)3	3	0.383	0.617	128
w1118	C(1;Y)3	w1118C(1;Y)3	4	0.516	0.484	126
w1118	C(1;Y)3	w1118C(1;Y)3	5	0.41	0.59	156
w1118	C(1;Y)3	w1118C(1;Y)3	6	0.446	0.554	112
w1118	C(1;Y)3	w1118C(1;Y)3	7	0.403	0.597	154
w1118	C(1;Y)3	w1118C(1;Y)3	8	0.432	0.568	81
w1118	C(1;Y)3	w1118C(1;Y)3	9	0.486	0.514	140
w1118	C(1;Y)3	w1118C(1;Y)3	10	0.61	0.39	41
w1118	C(1;Y)3	w1118C(1;Y)3	11	0.523	0.477	153
w1118	C(1;Y)3	w1118C(1;Y)3	12	0.504	0.496	135
w1118	C(1;Y)3	w1118C(1;Y)3	13	0.379	0.621	140
w1118	C(1;Y)3	w1118C(1;Y)3	14	0.555	0.445	191
w1118	C(1;Y)3	w1118C(1;Y)3	15	0.435	0.565	168
w1118	C(1;Y)3	w1118C(1;Y)3	16	0.437	0.563	174
w1118	C(1;Y)3	w1118C(1;Y)3	17	0.483	0.517	172
w1118	C(1;Y)3	w1118C(1;Y)3	18	0.506	0.494	162
w1118	C(1;Y)3	w1118C(1;Y)3	19	0.434	0.566	122
w1118	C(1:Y)6	w1118C(1:Y)6	1	0.523	0.477	128
w1118	C(1:Y)6	w1118C(1:Y)6	2	0.536	0.464	138
w1118	C(1:Y)6	w1118C(1:Y)6	3	0.503	0.497	151
w1118	C(1:Y)6	w1118C(1:Y)6	4	0.47	0.53	168
w1118	C(1:Y)6	w1118C(1:Y)6	5	0.473	0.527	129
w1118	C(1:Y)6	w1118C(1:Y)6	6	0.567	0.433	150
w1118	C(1:Y)6	w1118C(1:Y)6	7	0.545	0.455	145
w1118	C(1:Y)6	w1118C(1:Y)6	8	0.5	0.5	150
w1118	C(1:Y)6	w1118C(1:Y)6	9	0.531	0.469	143
w1118	C(1:Y)6	w1118C(1:Y)6	10	0.433	0.567	134
w1118	C(1:Y)6	w1118C(1:Y)6	11	0.455	0.545	101
w1118	C(1:Y)6	w1118C(1:Y)6	12	0.562	0.438	169
w1118	C(1:Y)6	w1118C(1:Y)6	13	0.543	0.457	138
w1118	C(1:Y)6	w1118C(1:Y)6	14	0.545	0.455	167
w1118	C(1:Y)6	w1118C(1:Y)6	15	0.582	0.418	194
w1118	C(1:Y)6	w1118C(1:Y)6	16	0.511	0.489	178
w1118	C(1:Y)6	w1118C(1:Y)6	17	0.526	0.474	192
w1118	C(1:Y)6	w1118C(1:Y)6	18	0.387	0.613	163
w1118	C(1:Y)6	w1118C(1:Y)6	19	0.468	0.532	158
w1118	C(1:Y)6	w1118C(1:Y)6	20	0.529	0.471	170
w1118	C(1:Y)6	w1118C(1:Y)6	21	0.451	0.549	173
w1118	C(1:Y)6	w1118C(1:Y)6	22	0.633	0.367	139
w1118	C(1:Y)6	w1118C(1:Y)6	23	0.571	0.429	63
w1118	C(1:Y)6	w1118C(1:Y)6	24	0.488	0.512	164
w1118	C(1:Y)6	w1118C(1:Y)6	25	0.57	0.43	86
w1118	C(1:Y)6	w1118C(1:Y)6	26	0.604	0.396	149
w1118	C(1:Y)6	w1118C(1:Y)6	27	0.553	0.447	150
w1118	C(1:Y)6	w1118C(1:Y)6	28	0.587	0.413	121
w1118	C(1:Y)6	w1118C(1:Y)6	29	0.597	0.403	77
w1118	C(1:Y)6	w1118C(1:Y)6	30	0.558	0.442	163
w1118	C(1:Y)6	w1118C(1:Y)6	31	0.521	0.479	119
w1118	C(1:Y)6	w1118C(1:Y)6	32	0.469	0.531	98
w1118	C(1:Y)6	w1118C(1:Y)6	33	0.519	0.481	129
w1118	C(1:Y)6	w1118C(1:Y)6	34	0.479	0.521	71
w1118	C(1:Y)6	w1118C(1:Y)6	35	0.44	0.56	141
w1118	C(1:Y)6	w1118C(1:Y)6	36	0.433	0.567	134
w1118	C(1:Y)6	w1118C(1:Y)6	37	0.488	0.512	86
w1118	C(1:Y)6	w1118C(1:Y)6	38	0.56	0.44	141
w1118	C(1:Y)6	w1118C(1:Y)6	39	0.517	0.483	89
w1118	C(1:Y)6	w1118C(1:Y)6	40	0.563	0.437	103
w1118	C(1:Y)6	w1118C(1:Y)6	41	0.471	0.529	119
w1118	C(1:Y)6	w1118C(1:Y)6	42	0.639	0.361	83
w1118	C(1:Y)6	w1118C(1:Y)6	43	0.417	0.583	139
w1118	C(1:Y)6	w1118C(1:Y)6	44	0.46	0.54	50
w1118	C(1:Y)6	w1118C(1:Y)6	45	0.496	0.504	119
w1118	C(1:Y)6	w1118C(1:Y)6	46	0.515	0.485	136
w1118	C(1:Y)6	w1118C(1:Y)6	47	0.375	0.625	64
Blm	w1118	Blmw1118	1	0.375	0.625	24
Blm	w1118	Blmw1118	2	0.71	0.29	31
Blm	w1118	Blmw1118	3	0.533	0.467	30
Blm	w1118	Blmw1118	4	0.833	0.167	24
Blm	w1118	Blmw1118	5	0.672	0.328	64
Blm	w1118	Blmw1118	6	0.792	0.208	53
Blm	w1118	Blmw1118	7	0.625	0.375	16
Blm	w1118	Blmw1118	8	0.744	0.256	43
Blm	w1118	Blmw1118	9	0.783	0.217	46
Blm	w1118	Blmw1118	10	0.625	0.375	8
Blm	w1118	Blmw1118	11	0.719	0.281	57
Blm	w1118	Blmw1118	12	0.625	0.375	32
Blm	w1118	Blmw1118	13	0.735	0.265	34
Blm	w1118	Blmw1118	14	0.917	0.083	24
Blm	w1118	Blmw1118	15	0.8	0.2	35
Blm	w1118	Blmw1118	16	0.724	0.276	29
Blm	w1118	Blmw1118	17	0.719	0.281	32
Blm	w1118	Blmw1118	18	0.719	0.281	64
Blm	w1118	Blmw1118	19	0.677	0.323	65
Blm	w1118	Blmw1118	20	0.538	0.462	26
Blm	w1118	Blmw1118	21	0.738	0.262	42
Blm	w1118	Blmw1118	22	0.658	0.342	38
Blm	w1118	Blmw1118	23	0.688	0.313	48
Blm	w1118	Blmw1118	24	0.538	0.462	26
Blm	w1118	Blmw1118	25	0.3	0.7	10
Blm	w1118	Blmw1118	26	0.677	0.323	31
Blm	w1118	Blmw1118	27	0.778	0.222	27
Blm	w1118	Blmw1118	28	0.756	0.244	41
Blm	w1118	Blmw1118	29	0.692	0.308	52
Blm	w1118	Blmw1118	30	0.833	0.167	18
Blm	w1118	Blmw1118	31	0.75	0.25	40
Blm	w1118	Blmw1118	32	0.72	0.28	25
Blm	w1118	Blmw1118	33	0.73	0.27	37
Blm	w1118	Blmw1118	34	1	0	5
Blm	w1118	Blmw1118	35	0.667	0.333	6
Blm	w1118	Blmw1118	36	0.813	0.188	16
Blm	w1118	Blmw1118	37	0.875	0.125	16
Blm	w1118	Blmw1118	38	0.75	0.25	8
Blm	w1118	Blmw1118	39	0.8	0.2	30
Blm	w1118	Blmw1118	40	0.712	0.288	52
Blm	w1118	Blmw1118	41	0.769	0.231	13
Blm	w1118	Blmw1118	42	0.736	0.264	53
Blm	w1118	Blmw1118	43	0.792	0.208	53
Blm	w1118	Blmw1118	44	0.784	0.216	51
Blm	w1118	Blmw1118	45	0.8	0.2	25
Blm	w1118	Blmw1118	46	0.7	0.3	20
Blm	w1118	Blmw1118	47	0.75	0.25	28
Blm	w1118	Blmw1118	48	0.633	0.367	30
Blm	w1118	Blmw1118	49	0.714	0.286	35
Blm	w1118	Blmw1118	50	0.683	0.317	41
Blm	w1118	Blmw1118	51	0.633	0.367	49
Blm	ln(1)	Blmln(1)	1	0.797	0.203	79
Blm	ln(1)	Blmln(1)	2	0.761	0.239	46
Blm	ln(1)	Blmln(1)	3	0.8	0.2	55
Blm	ln(1)	Blmln(1)	4	0.815	0.185	54
Blm	ln(1)	Blmln(1)	5	0.827	0.173	52
Blm	ln(1)	Blmln(1)	6	0.747	0.253	79
Blm	ln(1)	Blmln(1)	7	0.675	0.325	77
Blm	ln(1)	Blmln(1)	8	0.759	0.241	79
Blm	ln(1)	Blmln(1)	9	0.806	0.194	31
Blm	ln(1)	Blmln(1)	10	0.571	0.429	28
Blm	ln(1)	Blmln(1)	11	0.733	0.267	116
Blm	ln(1)	Blmln(1)	12	0.814	0.186	59
Blm	ln(1)	Blmln(1)	13	0.684	0.316	57
Blm	ln(1)	Blmln(1)	14	0.778	0.222	45
Blm	ln(1)	Blmln(1)	15	0.808	0.192	52
Blm	ln(1)	Blmln(1)	16	0.763	0.237	59
Blm	ln(1)	Blmln(1)	17	0.737	0.263	99
Blm	ln(1)	Blmln(1)	18	0.732	0.268	71
Blm	ln(1)	Blmln(1)	19	0.765	0.235	34
Blm	ln(1)	Blmln(1)	20	0.941	0.059	17
Blm	ln(1)	Blmln(1)	21	0.857	0.143	35
Blm	ln(1)	Blmln(1)	22	0.889	0.111	18
Blm	ln(1)	Blmln(1)	23	0.735	0.265	34
Blm	ln(1)	Blmln(1)	24	0.778	0.222	36
Blm	ln(1)	Blmln(1)	25	0.703	0.297	37
Blm	ln(1)	Blmln(1)	26	0.8	0.2	25
Blm	ln(1)	Blmln(1)	27	0.815	0.185	27
Blm	ln(1)	Blmln(1)	28	0.841	0.159	44
Blm	ln(1)	Blmln(1)	29	0.717	0.283	53
Blm	ln(1)	Blmln(1)	30	0.683	0.317	63
Blm	ln(1)	Blmln(1)	31	0.688	0.313	32
Blm	ln(1)	Blmln(1)	32	0.727	0.273	22
Blm	ln(1)	Blmln(1)	33	0.796	0.204	49
Blm	ln(1)	Blmln(1)	34	0.698	0.302	43
Blm	ln(1)	Blmln(1)	35	0.765	0.235	17
Blm	ln(1)	Blmln(1)	36	0.846	0.154	26
Blm	ln(1)	Blmln(1)	37	0.5	0.5	4
Blm	ln(1)	Blmln(1)	38	0.75	0.25	12
Blm	ln(1)	Blmln(1)	39	0.76	0.24	25
Blm	ln(1)	Blmln(1)	40	0.81	0.19	21
Blm	ln(1)	Blmln(1)	41	0.929	0.071	14
Blm	ln(1)	Blmln(1)	42	0.857	0.143	35
Blm	ln(1)	Blmln(1)	43	0.87	0.13	46
Blm	ln(1)	Blmln(1)	44	0.722	0.278	36
Blm	ln(1)	Blmln(1)	45	0.76	0.24	25
Blm	ln(1)	Blmln(1)	46	0.8	0.2	10
Blm	ln(1)	Blmln(1)	47	0.65	0.35	40
Blm	ln(1)	Blmln(1)	48	0.818	0.182	11
Blm	ln(1)	Blmln(1)	49	0.8	0.2	10
Blm	ln(1)	Blmln(1)	50	0.692	0.308	26
Blm	ln(1)	Blmln(1)	51	0.75	0.25	32
Blm	ln(1)	Blmln(1)	52	0.76	0.24	50
Blm	ln(1)	Blmln(1)	53	0.721	0.279	68
Blm	ln(1)	Blmln(1)	54	0.891	0.109	46
Blm	ln(1)	Blmln(1)	55	0.826	0.174	23
Blm	ln(1)	Blmln(1)	56	0.571	0.429	14
Blm	ln(1)	Blmln(1)	57	0.55	0.45	20
Blm	ln(1)	Blmln(1)	58	0.767	0.233	30
Blm	ln(1)	Blmln(1)	59	0.816	0.184	38
Blm	ln(1)	Blmln(1)	60	0.714	0.286	21
Blm	ln(1)	Blmln(1)	61	0.792	0.208	24
Blm	ln(1)	Blmln(1)	62	0.808	0.192	26
Blm	ln(1)	Blmln(1)	63	0.628	0.372	86
Blm	ln(1)	Blmln(1)	64	0.7	0.3	20
Blm	ln(1)	Blmln(1)	65	0.704	0.296	27
Blm	ln(1)	Blmln(1)	66	0.842	0.158	38
Blm	ln(1)	Blmln(1)	67	0.724	0.276	29
Blm	ln(1)	Blmln(1)	68	0.732	0.268	41
Blm	ln(1)	Blmln(1)	69	0.84	0.16	25
Blm	ln(1)	Blmln(1)	70	0.813	0.188	32
Blm	ln(1)	Blmln(1)	71	0.727	0.273	33
Blm	ln(1)	Blmln(1)	72	0.767	0.233	30
Blm	ln(1)	Blmln(1)	73	0.667	0.333	54
Blm	ln(1)	Blmln(1)	74	0.571	0.429	21
Blm	ln(1)	Blmln(1)	75	0.769	0.231	26
Blm	ln(1)	Blmln(1)	76	0.739	0.261	46
Blm	ln(1)	Blmln(1)	77	0.826	0.174	46
Blm	ln(1)	Blmln(1)	78	0.857	0.143	21
Blm	ln(1)	Blmln(1)	79	0.698	0.302	63
Blm	ln(1)	Blmln(1)	80	1	0	4
Blm	ln(1)	Blmln(1)	81	0.871	0.129	31
Blm	ln(1)	Blmln(1)	82	0.833	0.167	6
Blm	ln(1)	Blmln(1)	83	0.895	0.105	19
Blm	ln(1)	Blmln(1)	84	0.5	0.5	2
Blm	ln(1)	Blmln(1)	85	0.667	0.333	3
Blm	ln(1)	Blmln(1)	86	0.759	0.241	29
Blm	ln(1)	Blmln(1)	87	0.784	0.216	51
Blm	ln(1)	Blmln(1)	88	0.667	0.333	12
Blm	ln(1)	Blmln(1)	89	0.545	0.455	11
Blm	ln(1)	Blmln(1)	90	0.889	0.111	18
Blm	ln(1)	Blmln(1)	91	0.621	0.379	29
Blm	ln(1)	Blmln(1)	92	1	0	11
Blm	ln(1)	Blmln(1)	93	0.778	0.222	27
Blm	ln(1)	Blmln(1)	94	1	0	3
Blm	ln(1)	Blmln(1)	95	0.833	0.167	12
Blm	ln(1)	Blmln(1)	96	0.893	0.107	28
Blm	ln(1)	Blmln(1)	97	0.786	0.214	28
Blm	ln(1)	Blmln(1)	98	0.727	0.273	22
Blm	ln(1)	Blmln(1)	99	0.72	0.28	25
Blm	ln(1)	Blmln(1)	100	0.73	0.27	37
Blm	ln(1)	Blmln(1)	101	0.733	0.267	45
Blm	ln(1)	Blmln(1)	102	0.667	0.333	6
Blm	ln(1)	Blmln(1)	103	0.65	0.35	20
Blm	ln(1)	Blmln(1)	104	0.793	0.207	29
Blm	ln(1)	Blmln(1)	105	0.833	0.167	12
Blm	ln(1)	Blmln(1)	106	0.833	0.167	6
Blm	ln(1)	Blmln(1)	107	0.714	0.286	21
Blm	ln(1)	Blmln(1)	108	0.778	0.222	9
Blm	ln(1)	Blmln(1)	109	0.889	0.111	27
Blm	ln(1)	Blmln(1)	110	0.727	0.273	22
Blm	ln(1)	Blmln(1)	111	0.765	0.235	17
Blm	ln(1)	Blmln(1)	112	0.6	0.4	10
Blm	ln(1)	Blmln(1)	113	0.714	0.286	7
Blm	ln(1)	Blmln(1)	114	0.5	0.5	6
Blm	ln(1)	Blmln(1)	115	0.839	0.161	31
Blm	ln(1)	Blmln(1)	116	0.72	0.28	25
Blm	ln(1)	Blmln(1)	117	0.833	0.167	12
Blm	ln(1)	Blmln(1)	118	0.903	0.097	31
Blm	y+Y	Blmy+Y	1	0.802	0.198	81
Blm	y+Y	Blmy+Y	2	0.688	0.313	80
Blm	y+Y	Blmy+Y	3	0.875	0.125	40
Blm	y+Y	Blmy+Y	4	0.742	0.258	66
Blm	y+Y	Blmy+Y	5	0.737	0.263	99
Blm	y+Y	Blmy+Y	6	0.805	0.195	87
Blm	y+Y	Blmy+Y	7	0.699	0.301	113
Blm	y+Y	Blmy+Y	8	0.84	0.16	50
Blm	y+Y	Blmy+Y	9	0.771	0.229	70
Blm	y+Y	Blmy+Y	10	0.761	0.239	92
Blm	y+Y	Blmy+Y	11	0.783	0.217	60
Blm	y+Y	Blmy+Y	12	0.753	0.247	81
Blm	y+Y	Blmy+Y	13	0.675	0.325	77
Blm	y+Y	Blmy+Y	14	0.797	0.203	59
Blm	y+Y	Blmy+Y	15	0.621	0.379	95
Blm	y+Y	Blmy+Y	16	0.796	0.204	49
Blm	y+Y	Blmy+Y	17	0.854	0.146	48
Blm	y+Y	Blmy+Y	18	0.847	0.153	59
Blm	y+Y	Blmy+Y	19	0.854	0.146	41
Blm	y+Y	Blmy+Y	20	0.828	0.172	29
Blm	y+Y	Blmy+Y	21	0.796	0.204	54
Blm	y+Y	Blmy+Y	22	0.936	0.064	47
Blm	y+Y	Blmy+Y	23	0.857	0.143	21
Blm	y+Y	Blmy+Y	24	0.795	0.205	39
Blm	y+Y	Blmy+Y	25	0.894	0.106	47
Blm	y+Y	Blmy+Y	26	0.781	0.219	64
Blm	y+Y	Blmy+Y	27	0.875	0.125	16
Blm	y+Y	Blmy+Y	28	0.724	0.276	29
Blm	y+Y	Blmy+Y	29	0.867	0.133	30
Blm	y+Y	Blmy+Y	30	0.727	0.273	22
Blm	y+Y	Blmy+Y	31	0.848	0.152	33
Blm	y+Y	Blmy+Y	32	0.815	0.185	27
Blm	y+Y	Blmy+Y	33	0.829	0.171	35
Blm	y+Y	Blmy+Y	34	0.806	0.194	31
Blm	y+Y	Blmy+Y	35	0.897	0.103	58
Blm	y+Y	Blmy+Y	36	0.829	0.171	41
Blm	y+Y	Blmy+Y	37	1	0	11
Blm	y+Y	Blmy+Y	38	0.818	0.182	11
Blm	y+Y	Blmy+Y	39	1	0	8
Blm	y+Y	Blmy+Y	40	0.913	0.087	23
Blm	y+Y	Blmy+Y	41	0.917	0.083	36
Blm	y+Y	Blmy+Y	42	0.903	0.097	31
Blm	y+Y	Blmy+Y	43	0.925	0.075	40
Blm	y+Y	Blmy+Y	44	0.833	0.167	36
Blm	y+Y	Blmy+Y	45	0.83	0.17	53
Blm	y+Y	Blmy+Y	46	0.796	0.204	49
Blm	y+Y	Blmy+Y	47	0.714	0.286	42
Blm	y+Y	Blmy+Y	48	0.854	0.146	48
Blm	y+Y	Blmy+Y	49	1	0	11
Blm	y+Y	Blmy+Y	50	0.763	0.237	38
Blm	y+Y	Blmy+Y	51	0.821	0.179	39
Blm	y+Y	Blmy+Y	52	0.667	0.333	48
Blm	y+Y	Blmy+Y	53	0.78	0.22	50
Blm	y+Y	Blmy+Y	54	0.818	0.182	77
Blm	y+Y	Blmy+Y	55	0.706	0.294	68
Blm	y+Y	Blmy+Y	56	0.738	0.262	42
Blm	y+Y	Blmy+Y	57	0.941	0.059	17
Blm	y+Y	Blmy+Y	58	0.758	0.242	33
Blm	y+Y	Blmy+Y	59	0.882	0.118	34
Blm	y+Y	Blmy+Y	60	0.706	0.294	17
Blm	y+Y	Blmy+Y	61	0.808	0.192	26
Blm	y+Y	Blmy+Y	62	0.813	0.188	32
Blm	y+Y	Blmy+Y	63	0.77	0.23	61
Blm	y+Y	Blmy+Y	64	0.704	0.296	27
Blm	y+Y	Blmy+Y	65	0.852	0.148	27
Blm	y+Y	Blmy+Y	66	0.829	0.171	35
Blm	y+Y	Blmy+Y	67	0.724	0.276	76
Blm	y+Y	Blmy+Y	68	0.806	0.194	36
Blm	y+Y	Blmy+Y	69	0.786	0.214	70
Blm	y+Y	Blmy+Y	70	0.731	0.269	26
Blm	y+Y	Blmy+Y	71	0.762	0.238	21
Blm	y+Y	Blmy+Y	72	0.765	0.235	17
Blm	y+Y	Blmy+Y	73	0.829	0.171	41
Blm	y+Y	Blmy+Y	74	0.939	0.061	82
Blm	y+Y	Blmy+Y	75	0.759	0.241	58
Blm	y+Y	Blmy+Y	76	0.818	0.182	22
Blm	y+Y	Blmy+Y	77	0.78	0.22	41
Blm	y+Y	Blmy+Y	78	0.857	0.143	35
Blm	y+Y	Blmy+Y	79	0.696	0.304	46
Blm	y+Y	Blmy+Y	80	0.773	0.227	22
Blm	y+Y	Blmy+Y	81	0.593	0.407	27
Blm	y+Y	Blmy+Y	82	0.643	0.357	14
Blm	y+Y	Blmy+Y	83	0.857	0.143	7
Blm	y+Y	Blmy+Y	84	0.932	0.068	44
Blm	y+Y	Blmy+Y	85	0.731	0.269	26
Blm	y+Y	Blmy+Y	86	0.742	0.258	31
Blm	y+Y	Blmy+Y	87	0.771	0.229	35
Blm	y+Y	Blmy+Y	88	0.723	0.277	47
Blm	y+Y	Blmy+Y	89	0.889	0.111	9
Blm	y+Y	Blmy+Y	90	0.893	0.107	28
Blm	y+Y	Blmy+Y	91	0.756	0.244	41
Blm	y+Y	Blmy+Y	92	0.773	0.227	22
Blm	y+Y	Blmy+Y	93	0.909	0.091	11
Blm	y+Y	Blmy+Y	94	0.8	0.2	30
Blm	y+Y	Blmy+Y	95	1	0	5
Blm	y+Y	Blmy+Y	96	0.724	0.276	29
Blm	BSY	BlmBSY	1	0.956	0.044	45
Blm	BSY	BlmBSY	2	0.897	0.103	39
Blm	BSY	BlmBSY	3	0.925	0.075	67
Blm	BSY	BlmBSY	4	0.879	0.121	66
Blm	BSY	BlmBSY	5	0.786	0.214	98
Blm	BSY	BlmBSY	6	0.765	0.235	85
Blm	BSY	BlmBSY	7	0.802	0.198	91
Blm	BSY	BlmBSY	8	0.779	0.221	68
Blm	BSY	BlmBSY	9	0.855	0.145	55
Blm	BSY	BlmBSY	10	0.761	0.239	117
Blm	BSY	BlmBSY	11	0.896	0.104	48
Blm	BSY	BlmBSY	12	0.676	0.324	74
Blm	BSY	BlmBSY	13	0.709	0.291	79
Blm	BSY	BlmBSY	14	0.871	0.129	93
Blm	BSY	BlmBSY	15	0.85	0.15	80
Blm	BSY	BlmBSY	16	0.845	0.155	58
Blm	BSY	BlmBSY	17	0.813	0.188	112
Blm	BSY	BlmBSY	18	0.839	0.161	93
Blm	BSY	BlmBSY	19	0.906	0.094	32
Blm	BSY	BlmBSY	20	0.792	0.208	48
Blm	BSY	BlmBSY	21	0.884	0.116	43
Blm	BSY	BlmBSY	22	0.778	0.222	45
Blm	BSY	BlmBSY	23	0.833	0.167	24
Blm	BSY	BlmBSY	24	0.903	0.097	31
Blm	BSY	BlmBSY	25	0.872	0.128	94
Blm	BSY	BlmBSY	26	0.939	0.061	33
Blm	BSY	BlmBSY	27	0.889	0.111	45
Blm	BSY	BlmBSY	28	0.833	0.167	18
Blm	BSY	BlmBSY	29	0.87	0.13	23
Blm	BSY	BlmBSY	30	0.793	0.207	29
Blm	BSY	BlmBSY	31	0.837	0.163	43
Blm	BSY	BlmBSY	32	0.878	0.122	49
Blm	BSY	BlmBSY	33	0.829	0.171	35
Blm	BSY	BlmBSY	34	0.814	0.186	59
Blm	BSY	BlmBSY	35	1	0	19
Blm	BSY	BlmBSY	36	0.852	0.148	61
Blm	BSY	BlmBSY	37	0.783	0.217	23
Blm	BSY	BlmBSY	38	0.714	0.286	21
Blm	BSY	BlmBSY	39	0.867	0.133	30
Blm	BSY	BlmBSY	40	0.707	0.293	41
Blm	BSY	BlmBSY	41	0.815	0.185	54
Blm	BSY	BlmBSY	42	0.865	0.135	37
Blm	BSY	BlmBSY	43	0.887	0.113	53
Blm	BSY	BlmBSY	44	0.791	0.209	43
Blm	BSY	BlmBSY	45	0.806	0.194	31
Blm	BSY	BlmBSY	46	0.732	0.268	41
Blm	BSY	BlmBSY	47	0.813	0.188	32
Blm	BSY	BlmBSY	48	0.762	0.238	21
Blm	BSY	BlmBSY	49	0.92	0.08	50
Blm	BSY	BlmBSY	50	0.843	0.157	51
Blm	BSY	BlmBSY	51	0.75	0.25	32
Blm	BSY	BlmBSY	52	0.808	0.192	52
Blm	BSY	BlmBSY	53	0.855	0.145	62
Blm	BSY	BlmBSY	54	0.875	0.125	32
Blm	BSY	BlmBSY	55	0.826	0.174	46
Blm	BSY	BlmBSY	56	0.76	0.24	25
Blm	BSY	BlmBSY	57	0.865	0.135	52
Blm	BSY	BlmBSY	58	0.776	0.224	58
Blm	BSY	BlmBSY	59	0.778	0.222	45
Blm	BSY	BlmBSY	60	0.859	0.141	64
Blm	BSY	BlmBSY	61	0.848	0.152	33
Blm	BSY	BlmBSY	62	0.923	0.077	13
Blm	BSY	BlmBSY	63	0.88	0.12	25
Blm	BSY	BlmBSY	64	0.625	0.375	8
Blm	BSY	BlmBSY	65	0.889	0.111	9
Blm	BSY	BlmBSY	66	0.933	0.067	30
Blm	BSY	BlmBSY	67	0.923	0.077	26
Blm	BSY	BlmBSY	68	1	0	6
Blm	BSY	BlmBSY	69	0.914	0.086	35
Blm	BSY	BlmBSY	70	0.941	0.059	51
Blm	BSY	BlmBSY	71	1	0	6
Blm	BSY	BlmBSY	72	0.8	0.2	20
Blm	BSY	BlmBSY	73	0.963	0.037	27
Blm	BSY	BlmBSY	74	0.818	0.182	11
Blm	BSY	BlmBSY	75	1	0	6
Blm	BSY	BlmBSY	76	0.781	0.219	32
Blm	BSY	BlmBSY	77	1	0	11
Blm	BSY	BlmBSY	78	1	0	8
Blm	BSY	BlmBSY	79	0.8	0.2	15
Blm	BSY	BlmBSY	80	0.857	0.143	7
Blm	BSY	BlmBSY	81	0.895	0.105	19
Blm	BSY	BlmBSY	82	1	0	2
Blm	BSY	BlmBSY	83	1	0	7
Blm	BSY	BlmBSY	84	0.958	0.042	24
Blm	BSY	BlmBSY	85	0.889	0.111	9
Blm	BSY	BlmBSY	86	0.938	0.063	16
Blm	BSY	BlmBSY	87	0.933	0.067	15
Blm	BSY	BlmBSY	88	0.867	0.133	15
Blm	BSY	BlmBSY	89	0.824	0.176	17
Blm	BSY	BlmBSY	90	1	0	3
Blm	BSY	BlmBSY	91	0.833	0.167	12
Blm	BSY	BlmBSY	92	0.875	0.125	16
Blm	BSY	BlmBSY	93	0.818	0.182	33
Blm	BSY	BlmBSY	94	0.833	0.167	12
Blm	BSY	BlmBSY	95	0.75	0.25	4
Blm	BSY	BlmBSY	96	1	0	3
Blm	BSY	BlmBSY	97	1	0	1
Blm	BSY	BlmBSY	98	1	0	6
Blm	BSY	BlmBSY	99	0.6	0.4	5
Blm	BSY	BlmBSY	100	0.867	0.133	15
Blm	BSY	BlmBSY	101	1	0	2
Blm	BSY	BlmBSY	102	1	0	2
Blm	BSY	BlmBSY	103	1	0	2
Blm	BSY	BlmBSY	104	0.909	0.091	22
Blm	C(1;Y)3	BlmC(1;Y)3	1	0.13	0.87	23
Blm	C(1;Y)3	BlmC(1;Y)3	2	0	1	20
Blm	C(1;Y)3	BlmC(1;Y)3	3	0.222	0.778	9
Blm	C(1;Y)3	BlmC(1;Y)3	4	0	1	7
Blm	C(1;Y)3	BlmC(1;Y)3	5	0.231	0.769	13
Blm	C(1;Y)3	BlmC(1;Y)3	6	0	1	3
Blm	C(1;Y)3	BlmC(1;Y)3	7	0.143	0.857	14
Blm	C(1;Y)3	BlmC(1;Y)3	8	0	1	8
Blm	C(1;Y)3	BlmC(1;Y)3	9	0.033	0.967	30
Blm	C(1;Y)3	BlmC(1;Y)3	10	0	1	2
Blm	C(1;Y)3	BlmC(1;Y)3	11	0	1	7
Blm	C(1;Y)3	BlmC(1;Y)3	12	0	1	6
Blm	C(1;Y)3	BlmC(1;Y)3	13	0.5	0.5	2
Blm	C(1;Y)3	BlmC(1;Y)3	14	0.1	0.9	10
Blm	C(1;Y)3	BlmC(1;Y)3	15	0.286	0.714	7
Blm	C(1;Y)3	BlmC(1;Y)3	16	0	1	20
Blm	C(1;Y)3	BlmC(1;Y)3	17	0.2	0.8	15
Blm	C(1;Y)3	BlmC(1;Y)3	18	0	1	14
Blm	C(1;Y)3	BlmC(1;Y)3	19	0.333	0.667	9
Blm	C(1;Y)3	BlmC(1;Y)3	20	0.174	0.826	23
Blm	C(1;Y)3	BlmC(1;Y)3	21	0.1	0.9	10
Blm	C(1;Y)3	BlmC(1;Y)3	22	0	1	11
Blm	C(1;Y)3	BlmC(1;Y)3	23	0.333	0.667	21
Blm	C(1;Y)3	BlmC(1;Y)3	24	0.167	0.833	12
Blm	C(1;Y)3	BlmC(1;Y)3	25	0	1	14
Blm	C(1;Y)3	BlmC(1;Y)3	26	0.263	0.737	19
Blm	C(1;Y)3	BlmC(1;Y)3	27	0.333	0.667	6
Blm	C(1;Y)3	BlmC(1;Y)3	28	0.04	0.96	25
Blm	C(1;Y)3	BlmC(1;Y)3	29	0.077	0.923	13
Blm	C(1;Y)3	BlmC(1;Y)3	30	0	1	10
Blm	C(1;Y)3	BlmC(1;Y)3	31	0.13	0.87	23
Blm	C(1;Y)3	BlmC(1;Y)3	32	0.111	0.889	9
Blm	C(1;Y)3	BlmC(1;Y)3	33	0.053	0.947	19
Blm	C(1;Y)3	BlmC(1;Y)3	34	0.032	0.968	31
Blm	C(1;Y)3	BlmC(1;Y)3	35	0.05	0.95	20
Blm	C(1;Y)3	BlmC(1;Y)3	36	0	1	7
Blm	C(1;Y)3	BlmC(1;Y)3	37	0.2	0.8	5
Blm	C(1;Y)3	BlmC(1;Y)3	38	0.077	0.923	26
Blm	C(1;Y)3	BlmC(1;Y)3	39	0.222	0.778	9
Blm	C(1;Y)3	BlmC(1;Y)3	40	0	1	1
Blm	C(1;Y)3	BlmC(1;Y)3	41	0.143	0.857	14
Blm	C(1;Y)3	BlmC(1;Y)3	42	0	1	1
Blm	C(1;Y)3	BlmC(1;Y)3	43	0.083	0.917	12
Blm	C(1;Y)3	BlmC(1;Y)3	44	0	1	1
Blm	C(1;Y)3	BlmC(1;Y)3	45	0.143	0.857	7
Blm	C(1;Y)3	BlmC(1;Y)3	46	0	1	10
Blm	C(1;Y)3	BlmC(1;Y)3	47	0	1	12
Blm	C(1;Y)3	BlmC(1;Y)3	48	0	1	8
Blm	C(1;Y)3	BlmC(1;Y)3	49	0.105	0.895	19
Blm	C(1;Y)3	BlmC(1;Y)3	50	0.043	0.957	23
Blm	C(1;Y)3	BlmC(1;Y)3	51	0.167	0.833	18
Blm	C(1;Y)3	BlmC(1;Y)3	52	0.143	0.857	14
Blm	C(1;Y)3	BlmC(1;Y)3	53	0	1	3
Blm	C(1;Y)3	BlmC(1;Y)3	54	0.2	0.8	10
Blm	C(1;Y)3	BlmC(1;Y)3	55	0.1	0.9	20
Blm	C(1;Y)3	BlmC(1;Y)3	56	0	1	5
Blm	C(1;Y)3	BlmC(1;Y)3	57	0	1	9
Blm	C(1;Y)3	BlmC(1;Y)3	58	0.091	0.909	22
Blm	C(1;Y)3	BlmC(1;Y)3	59	0	1	10
Blm	C(1;Y)3	BlmC(1;Y)3	60	0	1	3
Blm	C(1;Y)3	BlmC(1;Y)3	61	0	1	2
Blm	C(1;Y)3	BlmC(1;Y)3	62	0	1	4
Blm	C(1;Y)3	BlmC(1;Y)3	63	0	1	1
Blm	C(1;Y)3	BlmC(1;Y)3	64	0.154	0.846	13
Blm	C(1;Y)3	BlmC(1;Y)3	65	0.079	0.921	38
Blm	C(1;Y)3	BlmC(1;Y)3	66	0	1	14
Blm	C(1;Y)3	BlmC(1;Y)3	67	0.714	0.286	14
Blm	C(1;Y)3	BlmC(1;Y)3	68	0.087	0.913	23
Blm	C(1;Y)3	BlmC(1;Y)3	69	0.045	0.955	22
Blm	C(1;Y)3	BlmC(1;Y)3	70	0.125	0.875	8
Blm	C(1;Y)3	BlmC(1;Y)3	71	0.057	0.943	35
Blm	C(1;Y)3	BlmC(1;Y)3	72	0	1	7
Blm	C(1;Y)3	BlmC(1;Y)3	73	0.071	0.929	28
Blm	C(1;Y)3	BlmC(1;Y)3	74	0	1	7
Blm	C(1;Y)3	BlmC(1;Y)3	75	0	1	5
Blm	C(1;Y)3	BlmC(1;Y)3	76	0	1	2
Blm	C(1;Y)3	BlmC(1;Y)3	77	0.2	0.8	5
Blm	C(1;Y)3	BlmC(1;Y)3	78	0	1	8
Blm	C(1;Y)3	BlmC(1;Y)3	79	0.3	0.7	10
Blm	C(1;Y)3	BlmC(1;Y)3	80	0.214	0.786	28
Blm	C(1;Y)3	BlmC(1;Y)3	81	0	1	4
Blm	C(1;Y)3	BlmC(1;Y)3	82	0	1	14
Blm	C(1;Y)3	BlmC(1;Y)3	83	0.05	0.95	20
Blm	C(1;Y)3	BlmC(1;Y)3	84	0.095	0.905	21
Blm	C(1;Y)3	BlmC(1;Y)3	85	0	1	3
Blm	C(1;Y)3	BlmC(1;Y)3	86	0.143	0.857	14
Blm	C(1;Y)3	BlmC(1;Y)3	87	0.036	0.964	28
Blm	C(1;Y)3	BlmC(1;Y)3	88	0.083	0.917	12
Blm	C(1;Y)3	BlmC(1;Y)3	89	0.048	0.952	21
Blm	C(1;Y)3	BlmC(1;Y)3	90	0.176	0.824	17
Blm	C(1;Y)3	BlmC(1;Y)3	91	0.133	0.867	15
Blm	C(1;Y)3	BlmC(1;Y)3	92	0	1	2
Blm	C(1;Y)3	BlmC(1;Y)3	93	0	1	3
Blm	C(1;Y)3	BlmC(1;Y)3	94	0	1	10
Blm	C(1;Y)3	BlmC(1;Y)3	95	0.2	0.8	5
Blm	C(1;Y)3	BlmC(1;Y)3	96	0.143	0.857	28
Blm	C(1;Y)3	BlmC(1;Y)3	97	0.333	0.667	3
Blm	C(1;Y)3	BlmC(1;Y)3	98	0	1	6
Blm	C(1;Y)3	BlmC(1;Y)3	99	0	1	6
Blm	C(1;Y)3	BlmC(1;Y)3	100	0.125	0.875	8
Blm	C(1;Y)3	BlmC(1;Y)3	101	0	1	6
Blm	C(1;Y)3	BlmC(1;Y)3	102	0.133	0.867	15
Blm	C(1;Y)3	BlmC(1;Y)3	103	0.167	0.833	6
Blm	C(1;Y)3	BlmC(1;Y)3	104	0	1	10
Blm	C(1;Y)3	BlmC(1;Y)3	105	0.25	0.75	4
Blm	C(1;Y)3	BlmC(1;Y)3	106	0.04	0.96	25
Blm	C(1;Y)3	BlmC(1;Y)3	107	0.222	0.778	9
Blm	C(1;Y)6	BlmC(1;Y)6	1	0	1	9
Blm	C(1;Y)6	BlmC(1;Y)6	2	0.086	0.914	35
Blm	C(1;Y)6	BlmC(1;Y)6	3	0	1	6
Blm	C(1;Y)6	BlmC(1;Y)6	4	0.091	0.909	33
Blm	C(1;Y)6	BlmC(1;Y)6	5	0.05	0.95	20
Blm	C(1;Y)6	BlmC(1;Y)6	6	0	1	15
Blm	C(1;Y)6	BlmC(1;Y)6	7	0	1	17
Blm	C(1;Y)6	BlmC(1;Y)6	8	0	1	13
Blm	C(1;Y)6	BlmC(1;Y)6	9	0.056	0.944	18
Blm	C(1;Y)6	BlmC(1;Y)6	10	0	1	13
Blm	C(1;Y)6	BlmC(1;Y)6	11	0.108	0.892	37
Blm	C(1;Y)6	BlmC(1;Y)6	12	0	1	19
Blm	C(1;Y)6	BlmC(1;Y)6	13	0.125	0.875	8
Blm	C(1;Y)6	BlmC(1;Y)6	14	0.083	0.917	24
Blm	C(1;Y)6	BlmC(1;Y)6	15	0.043	0.957	23
Blm	C(1;Y)6	BlmC(1;Y)6	16	0.118	0.882	17
Blm	C(1;Y)6	BlmC(1;Y)6	17	0.25	0.75	4
Blm	C(1;Y)6	BlmC(1;Y)6	18	0	1	20
Blm	C(1;Y)6	BlmC(1;Y)6	19	0.15	0.85	20
Blm	C(1;Y)6	BlmC(1;Y)6	20	0.097	0.903	31
Blm	C(1;Y)6	BlmC(1;Y)6	21	0.375	0.625	8
Blm	C(1;Y)6	BlmC(1;Y)6	22	0.048	0.952	21
Blm	C(1;Y)6	BlmC(1;Y)6	23	0.053	0.947	38
Blm	C(1;Y)6	BlmC(1;Y)6	24	0	1	1
Blm	C(1;Y)6	BlmC(1;Y)6	25	0.2	0.8	10
Blm	C(1;Y)6	BlmC(1;Y)6	26	0.059	0.941	17
Blm	C(1;Y)6	BlmC(1;Y)6	27	0.077	0.923	13
Blm	C(1;Y)6	BlmC(1;Y)6	28	0	1	3
Blm	C(1;Y)6	BlmC(1;Y)6	29	0	1	6
Blm	C(1;Y)6	BlmC(1;Y)6	30	0	1	2
Blm	C(1;Y)6	BlmC(1;Y)6	31	0.2	0.8	5
Blm	C(1;Y)6	BlmC(1;Y)6	32	0.048	0.952	21
Blm	C(1;Y)6	BlmC(1;Y)6	33	0	1	1
Blm	C(1;Y)6	BlmC(1;Y)6	34	0	1	25
Blm	C(1;Y)6	BlmC(1;Y)6	35	0.111	0.889	9
Blm	C(1;Y)6	BlmC(1;Y)6	36	0.143	0.857	7
Blm	C(1;Y)6	BlmC(1;Y)6	37	0.333	0.667	3
Blm	C(1;Y)6	BlmC(1;Y)6	38	0.176	0.824	17
Blm	C(1;Y)6	BlmC(1;Y)6	39	0.111	0.889	27
Blm	C(1;Y)6	BlmC(1;Y)6	40	0	1	6
Blm	C(1;Y)6	BlmC(1;Y)6	41	0	1	9
Blm	C(1;Y)6	BlmC(1;Y)6	42	0.091	0.909	22
Blm	C(1;Y)6	BlmC(1;Y)6	43	0	1	5
Blm	C(1;Y)6	BlmC(1;Y)6	44	0	1	15
Blm	C(1;Y)6	BlmC(1;Y)6	45	0	1	3
Blm	C(1;Y)6	BlmC(1;Y)6	46	0.053	0.947	19
Blm	C(1;Y)6	BlmC(1;Y)6	47	0.055	0.945	55
Blm	C(1;Y)6	BlmC(1;Y)6	48	0.1	0.9	20
Blm	C(1;Y)6	BlmC(1;Y)6	49	0	1	28
Blm	C(1;Y)6	BlmC(1;Y)6	50	0.217	0.783	23
Blm	C(1;Y)6	BlmC(1;Y)6	51	0.021	0.979	47
Blm	C(1;Y)6	BlmC(1;Y)6	52	0.074	0.926	27
Blm	C(1;Y)6	BlmC(1;Y)6	53	0	1	31
Blm	C(1;Y)6	BlmC(1;Y)6	54	0.1	0.9	40
Blm	C(1;Y)6	BlmC(1;Y)6	55	0.154	0.846	39
Blm	C(1;Y)6	BlmC(1;Y)6	56	0.121	0.879	33
Blm	C(1;Y)6	BlmC(1;Y)6	57	0	1	7
Blm	C(1;Y)6	BlmC(1;Y)6	58	0.028	0.972	36
Blm	C(1;Y)6	BlmC(1;Y)6	59	0.049	0.951	41
Blm	C(1;Y)6	BlmC(1;Y)6	60	0.135	0.865	37
Blm	C(1;Y)6	BlmC(1;Y)6	61	0.087	0.913	23
Blm	C(1;Y)6	BlmC(1;Y)6	62	0.12	0.88	25
Blm	C(1;Y)6	BlmC(1;Y)6	63	0.063	0.938	32
Blm	C(1;Y)6	BlmC(1;Y)6	64	0.038	0.962	26
Blm	C(1;Y)6	BlmC(1;Y)6	65	0.136	0.864	22
Blm	C(1;Y)6	BlmC(1;Y)6	66	0.103	0.897	39
Blm	C(1;Y)6	BlmC(1;Y)6	67	0.086	0.765	17
Blm	C(1;Y)6	BlmC(1;Y)6	68	0.086	1	13
Blm	C(1;Y)6	BlmC(1;Y)6	69	0.086	1	25
Blm	C(1;Y)6	BlmC(1;Y)6	70	0.087	0.964	28
Blm	C(1;Y)6	BlmC(1;Y)6	71	0.087	0.923	26
Blm	C(1;Y)6	BlmC(1;Y)6	72	0.087	0.895	38
Blm	C(1;Y)6	BlmC(1;Y)6	73	0.088	0.824	17
Blm	C(1;Y)6	BlmC(1;Y)6	74	0.088	0.963	27
Blm	C(1;Y)6	BlmC(1;Y)6	75	0.088	0.889	18
Blm	C(1;Y)6	BlmC(1;Y)6	76	0.089	0.958	24
Blm	C(1;Y)6	BlmC(1;Y)6	77	0.089	0.938	32
Blm	C(1;Y)6	BlmC(1;Y)6	78	0.089	1	27
Blm	C(1;Y)6	BlmC(1;Y)6	79	0.09	1	14
Blm	C(1;Y)6	BlmC(1;Y)6	80	0.09	0.81	21
Blm	C(1;Y)6	BlmC(1;Y)6	81	0.09	1	15
Blm	C(1;Y)6	BlmC(1;Y)6	82	0.091	0.903	31
Blm	C(1;Y)6	BlmC(1;Y)6	83	0.091	0.833	6
Blm	C(1;Y)6	BlmC(1;Y)6	84	0.091	0.923	13
Blm	C(1;Y)6	BlmC(1;Y)6	85	0.092	0.778	9
Blm	C(1;Y)6	BlmC(1;Y)6	86	0.092	0.9	10
Blm	C(1;Y)6	BlmC(1;Y)6	87	0.092	0.909	22
Blm	C(1;Y)6	BlmC(1;Y)6	88	0.093	1	5
Blm	C(1;Y)6	BlmC(1;Y)6	89	0.093	0.818	11
Blm	C(1;Y)6	BlmC(1;Y)6	90	0.093	1	24
Blm	C(1;Y)6	BlmC(1;Y)6	91	0.094	0.962	26
Blm	C(1;Y)6	BlmC(1;Y)6	92	0.094	0.93	43
Blm	C(1;Y)6	BlmC(1;Y)6	93	0.094	0.948	58
Blm	C(1;Y)6	BlmC(1;Y)6	94	0.095	0.864	22
Blm	C(1;Y)6	BlmC(1;Y)6	95	0.095	0.905	21
Blm	C(1;Y)6	BlmC(1;Y)6	96	0.095	0.952	21
Blm	C(1;Y)6	BlmC(1;Y)6	97	0.096	0.952	21
Blm	C(1;Y)6	BlmC(1;Y)6	98	0.096	1	8
Blm	C(1;Y)6	BlmC(1;Y)6	99	0.096	1	9
Blm	C(1;Y)6	BlmC(1;Y)6	100	0.097	1	5
Blm	C(1;Y)6	BlmC(1;Y)6	101	0.097	0.929	14
Blm	C(1;Y)6	BlmC(1;Y)6	102	0.097	0.808	26
Blm	C(1;Y)6	BlmC(1;Y)6	103	0.097	0.913	46
Blm	C(1;Y)6	BlmC(1;Y)6	104	0.098	0.885	26
Blm	C(1;Y)6	BlmC(1;Y)6	105	0.098	0.926	54
Blm	C(1;Y)6	BlmC(1;Y)6	106	0.098	0.857	21
Blm	C(1;Y)6	BlmC(1;Y)6	107	0.099	1	13
N2	w1118	N2w1118	1	0.532	0.468	127
N2	w1118	N2w1118	2	0.538	0.462	158
N2	w1118	N2w1118	3	0.517	0.483	149
N2	w1118	N2w1118	4	0.558	0.442	78
N2	w1118	N2w1118	5	0.62069	0.379	145
N2	w1118	N2w1118	6	0.613139	0.387	139
N2	w1118	N2w1118	7	0.516129	0.484	155
N2	w1118	N2w1118	8	0.568345	0.432	140
N2	w1118	N2w1118	9	0.545455	0.455	123
N2	w1118	N2w1118	10	0.633803	0.366	144
N2	w1118	N2w1118	11	0.615385	0.385	131
N2	w1118	N2w1118	12	0.581197	0.419	118
N2	w1118	N2w1118	13	0.541353	0.459	135
N2	w1118	N2w1118	14	0.626761	0.373	142
N2	w1118	N2w1118	15	0.584	0.416	125
N2	w1118	N2w1118	16	0.571429	0.429	119
N2	w1118	N2w1118	17	0.570312	0.43	130
N2	w1118	N2w1118	18	0.568627	0.431	104
N2	w1118	N2w1118	19	0.621849	0.378	121
N2	w1118	N2w1118	20	0.521739	0.478	47
N2	w1118	N2w1118	21	0.652174	0.348	115
N2	w1118	N2w1118	22	0.612403	0.388	137
N2	w1118	N2w1118	23	0.669811	0.33	106
N2	w1118	N2w1118	24	0.607407	0.393	136
N2	w1118	N2w1118	25	0.578431	0.422	104
N2	w1118	N2w1118	26	0.5625	0.438	115
N2	w1118	N2w1118	27	0.607143	0.393	112
N2	w1118	N2w1118	28	0.445378	0.555	120
N2	w1118	N2w1118	29	0.512821	0.487	118
N2	w1118	N2w1118	30	0.609091	0.391	112
N2	w1118	N2w1118	31	0.578947	0.421	102
N2	w1118	N2w1118	32	0.521739	0.478	141
N2	w1118	N2w1118	33	0.416667	0.583	50
N2	w1118	N2w1118	34	0.595745	0.404	97
N2	w1118	N2w1118	35	0.54878	0.451	85
N2	w1118	N2w1118	36	0.512397	0.488	124
N2	w1118	N2w1118	37	0.55	0.45	40
N2	w1118	N2w1118	38	0.533835	0.466	134
N2	w1118	N2w1118	39	0.449275	0.551	70
N2	w1118	N2w1118	40	0.550459	0.45	110
N2	w1118	N2w1118	41	0.540984	0.459	122
N2	w1118	N2w1118	42	0.585106	0.415	95
N2	w1118	N2w1118	43	0.363636	0.636	55
N2	w1118	N2w1118	44	0.515625	0.484	64
N2	w1118	N2w1118	45	0.456	0.544	127
N2	BSY	N2BSY	1	0.590278	0.41	146
N2	BSY	N2BSY	2	0.539474	0.461	76
N2	BSY	N2BSY	3	0.545455	0.455	123
N2	BSY	N2BSY	4	0.453608	0.546	98
N2	BSY	N2BSY	5	0.609756	0.39	84
N2	BSY	N2BSY	6	0.566372	0.434	117
N2	BSY	N2BSY	7	0.558333	0.442	121
N2	BSY	N2BSY	8	0.512821	0.487	118
N2	BSY	N2BSY	9	0.543478	0.457	142
N2	BSY	N2BSY	10	0.520408	0.48	99
N2	BSY	N2BSY	11	0.512821	0.487	39
N2	BSY	N2BSY	12	0.586667	0.413	75
N2	BSY	N2BSY	13	0.5	0.5	116
N2	BSY	N2BSY	14	0.611511	0.388	139
N2	BSY	N2BSY	15	0.616438	0.384	73
N2	BSY	N2BSY	16	0.537313	0.463	67
N2	BSY	N2BSY	17	0.5	0.5	124
N2	BSY	N2BSY	18	0.525	0.475	120
N2	BSY	N2BSY	19	0.648148	0.352	54
N2	BSY	N2BSY	20	0.516667	0.483	123
N2	BSY	N2BSY	21	0.4625	0.538	81
N2	BSY	N2BSY	22	0.57377	0.426	61
N2	BSY	N2BSY	23	0.5	0.5	50
N2	BSY	N2BSY	24	0.459016	0.541	123
N2	BSY	N2BSY	25	0.527778	0.472	72
N2	BSY	N2BSY	26	0.485149	0.515	101
N2	BSY	N2BSY	27	0.517007	0.483	150
N2	BSY	N2BSY	28	0.537736	0.462	107
N2	BSY	N2BSY	29	0.535714	0.464	28
N2	BSY	N2BSY	30	0.5	0.5	55
N2	BSY	N2BSY	31	0.41791	0.582	67
N2	BSY	N2BSY	32	0.517857	0.482	113
N2	BSY	N2BSY	33	0.506329	0.494	79
N2	BSY	N2BSY	34	0.587302	0.413	126
N2	BSY	N2BSY	35	0.470588	0.529	85
N2	BSY	N2BSY	36	0.44186	0.558	44
N2	BSY	N2BSY	37	0.528846	0.471	104
N2	BSY	N2BSY	38	0.445946	0.554	77
N2	C(1;Y)6	N2C(1;Y)6	1	0.443548	0.556452	125
N2	C(1;Y)6	N2C(1;Y)6	2	0.352941	0.647059	68
N2	C(1;Y)6	N2C(1;Y)6	3	0.366412	0.633588	134
N2	C(1;Y)6	N2C(1;Y)6	4	0.421053	0.578947	114
N2	C(1;Y)6	N2C(1;Y)6	5	0.451613	0.548387	124
N2	C(1;Y)6	N2C(1;Y)6	6	0.4625	0.5375	80
N2	C(1;Y)6	N2C(1;Y)6	7	0.442308	0.557692	105
N2	C(1;Y)6	N2C(1;Y)6	8	0.329268	0.670732	85
N2	C(1;Y)6	N2C(1;Y)6	9	0.460938	0.539062	131
N2	C(1;Y)6	N2C(1;Y)6	10	0.166667	0.833333	42
N2	C(1;Y)6	N2C(1;Y)6	11	0.352941	0.647059	51
N2	C(1;Y)6	N2C(1;Y)6	12	0.309859	0.690141	71
N2	C(1;Y)6	N2C(1;Y)6	13	0.353846	0.646154	132
N2	C(1;Y)6	N2C(1;Y)6	14	0.369231	0.630769	65
N2	C(1;Y)6	N2C(1;Y)6	15	0.409836	0.590164	122
N2	C(1;Y)6	N2C(1;Y)6	16	0.391304	0.608696	92
N2	C(1;Y)6	N2C(1;Y)6	17	0.3	0.7	30
N2	C(1;Y)6	N2C(1;Y)6	18	0.333333	0.666667	91
N2	C(1;Y)6	N2C(1;Y)6	19	0.26	0.74	52
N2	C(1;Y)6	N2C(1;Y)6	20	0.477273	0.522727	88
N2	C(1;Y)6	N2C(1;Y)6	21	0.402299	0.597701	88
N2	C(1;Y)6	N2C(1;Y)6	22	0.469136	0.530864	81
N2	C(1;Y)6	N2C(1;Y)6	23	0.414286	0.585714	71
N2	C(1;Y)6	N2C(1;Y)6	24	0.488636	0.511364	88
N2	C(1;Y)6	N2C(1;Y)6	25	0.470588	0.529412	85
N2	C(1;Y)6	N2C(1;Y)6	26	0.444444	0.555556	84
N2	C(1;Y)6	N2C(1;Y)6	27	0.4375	0.5625	144
N2	C(1;Y)6	N2C(1;Y)6	28	0.378378	0.621622	37
N2	C(1;Y)6	N2C(1;Y)6	29	0.446809	0.553191	48
N2	C(1;Y)6	N2C(1;Y)6	30	0.507692	0.492308	67
N2	C(1;Y)6	N2C(1;Y)6	31	0.539474	0.460526	76
N2	C(1;Y)6	N2C(1;Y)6	32	0.541176	0.458824	87
N2	C(1;Y)6	N2C(1;Y)6	33	0.333333	0.666667	28
N2	C(1;Y)6	N2C(1;Y)6	34	0.43	0.57	103
N2	C(1;Y)6	N2C(1;Y)6	35	0.296703	0.703297	92
N2	C(1;Y)6	N2C(1;Y)6	36	0.392405	0.607595	81
N2	C(1;Y)6	N2C(1;Y)6	37	0.308411	0.691589	108
N2	C(1;Y)6	N2C(1;Y)6	38	0.222222	0.777778	54
N2	C(1;Y)6	N2C(1;Y)6	39	0.356322	0.643678	89
Polalpha	w1118	Polalphaw1118	1	0.686	0.314	70
Polalpha	w1118	Polalphaw1118	2	0.537	0.463	108
Polalpha	w1118	Polalphaw1118	3	0.55	0.45	40
Polalpha	w1118	Polalphaw1118	4	0.539	0.461	89
Polalpha	w1118	Polalphaw1118	5	0.469388	0.531	49
Polalpha	w1118	Polalphaw1118	6	0.551948	0.448	154
Polalpha	w1118	Polalphaw1118	7	0.477273	0.523	88
Polalpha	w1118	Polalphaw1118	8	0.423729	0.576	59
Polalpha	w1118	Polalphaw1118	9	0.528926	0.471	121
Polalpha	w1118	Polalphaw1118	10	0.424242	0.576	99
Polalpha	w1118	Polalphaw1118	11	0.615942	0.384	138
Polalpha	w1118	Polalphaw1118	12	0.55	0.45	140
Polalpha	w1118	Polalphaw1118	13	0.476562	0.523	128
Polalpha	w1118	Polalphaw1118	14	0.537815	0.462	119
Polalpha	w1118	Polalphaw1118	15	0.540541	0.459	37
Polalpha	w1118	Polalphaw1118	16	0.362069	0.638	58
Polalpha	w1118	Polalphaw1118	17	0.522388	0.478	67
Polalpha	w1118	Polalphaw1118	18	0.507576	0.492	132
Polalpha	w1118	Polalphaw1118	19	0.580952	0.419	105
Polalpha	w1118	Polalphaw1118	20	0.45122	0.549	82
Polalpha	w1118	Polalphaw1118	21	0.52381	0.476	84
Polalpha	w1118	Polalphaw1118	22	0.513333	0.487	150
Polalpha	w1118	Polalphaw1118	23	0.481928	0.518	83
Polalpha	w1118	Polalphaw1118	24	0.521127	0.479	142
Polalpha	w1118	Polalphaw1118	25	0.43299	0.567	97
Polalpha	C(1;Y)	PolalphaC(1;Y)	1	0.442623	0.557377	61
Polalpha	C(1;Y)	PolalphaC(1;Y)	2	0.476923	0.523077	65
Polalpha	C(1;Y)	PolalphaC(1;Y)	3	0.408163	0.591837	49
Polalpha	C(1;Y)	PolalphaC(1;Y)	4	0.551724	0.448276	58
Polalpha	C(1;Y)	PolalphaC(1;Y)	5	0.544118	0.455882	68
Polalpha	C(1;Y)	PolalphaC(1;Y)	6	0.367816	0.632184	87
Polalpha	C(1;Y)	PolalphaC(1;Y)	7	0.422414	0.577586	116
Polalpha	C(1;Y)	PolalphaC(1;Y)	8	0.377193	0.622807	114
Polalpha	C(1;Y)	PolalphaC(1;Y)	9	0.5	0.5	94
Polalpha	C(1;Y)	PolalphaC(1;Y)	10	0.592357	0.407643	157
Polalpha	C(1;Y)	PolalphaC(1;Y)	11	0.425373	0.574627	134
Polalpha	C(1;Y)	PolalphaC(1;Y)	12	0.521472	0.478528	163
Polalpha	C(1;Y)	PolalphaC(1;Y)	13	0.414815	0.585185	135
Polalpha	C(1;Y)	PolalphaC(1;Y)	14	0.554455	0.445545	101
Polalpha	C(1;Y)	PolalphaC(1;Y)	15	0.551471	0.448529	136
Polalpha	C(1;Y)	PolalphaC(1;Y)	16	0.457364	0.542636	129
Polalpha	C(1;Y)	PolalphaC(1;Y)	17	0.549669	0.450331	151
Polalpha; Blm	w1118	Polalpha; Blmw1118	1	0.766234	0.234	77
Polalpha; Blm	w1118	Polalpha; Blmw1118	2	0.666667	0.333	90
Polalpha; Blm	w1118	Polalpha; Blmw1118	3	0.742268	0.258	97
Polalpha; Blm	w1118	Polalpha; Blmw1118	4	0.691176	0.309	68
Polalpha; Blm	w1118	Polalpha; Blmw1118	5	0.676768	0.323	99
Polalpha; Blm	w1118	Polalpha; Blmw1118	6	0.796296	0.204	54
Polalpha; Blm	w1118	Polalpha; Blmw1118	7	0.875	0.125	56
Polalpha; Blm	w1118	Polalpha; Blmw1118	8	0.735849	0.264	53
Polalpha; Blm	w1118	Polalpha; Blmw1118	9	0.804124	0.196	97
Polalpha; Blm	w1118	Polalpha; Blmw1118	10	0.753086	0.247	81
Polalpha; Blm	w1118	Polalpha; Blmw1118	11	0.766234	0.234	77
Polalpha; Blm	w1118	Polalpha; Blmw1118	12	0.736264	0.264	91
Polalpha; Blm	w1118	Polalpha; Blmw1118	13	0.72	0.28	75
Polalpha; Blm	w1118	Polalpha; Blmw1118	14	0.683544	0.316	79
Polalpha; Blm	w1118	Polalpha; Blmw1118	15	0.736842	0.263	76
Polalpha; Blm	w1118	Polalpha; Blmw1118	16	0.796875	0.203	64
Polalpha; Blm	w1118	Polalpha; Blmw1118	17	0.732558	0.267	86
Polalpha; Blm	w1118	Polalpha; Blmw1118	18	0.745763	0.254	59
Polalpha; Blm	w1118	Polalpha; Blmw1118	19	0.71875	0.281	96
Polalpha; Blm	w1118	Polalpha; Blmw1118	20	0.813559	0.186	59
Polalpha; Blm	w1118	Polalpha; Blmw1118	21	0.716049	0.284	81
Polalpha; Blm	w1118	Polalpha; Blmw1118	22	0.777778	0.222	99
Polalpha; Blm	w1118	Polalpha; Blmw1118	23	0.726496	0.274	117
Polalpha; Blm	w1118	Polalpha; Blmw1118	24	0.765432	0.235	81
Polalpha; Blm	w1118	Polalpha; Blmw1118	25	0.686747	0.313	83
Polalpha; Blm	w1118	Polalpha; Blmw1118	26	0.732673	0.267	101
Polalpha; Blm	w1118	Polalpha; Blmw1118	27	0.631579	0.368	95
Polalpha; Blm	w1118	Polalpha; Blmw1118	28	0.736842	0.263	76
Polalpha; Blm	w1118	Polalpha; Blmw1118	29	0.75	0.25	56
Polalpha; Blm	w1118	Polalpha; Blmw1118	30	0.78125	0.219	96
Polalpha; Blm	w1118	Polalpha; Blmw1118	31	0.761905	0.238	63
Polalpha; Blm	w1118	Polalpha; Blmw1118	32	0.691176	0.309	68
Polalpha; Blm	w1118	Polalpha; Blmw1118	33	0.754902	0.245	102
Polalpha; Blm	w1118	Polalpha; Blmw1118	34	0.858974	0.141	78
Polalpha; Blm	w1118	Polalpha; Blmw1118	35	0.8	0.2	30
Polalpha; Blm	w1118	Polalpha; Blmw1118	36	0.703704	0.296	27
Polalpha; Blm	w1118	Polalpha; Blmw1118	37	0.792453	0.208	53
Polalpha; Blm	w1118	Polalpha; Blmw1118	38	0.675	0.325	80
Polalpha; Blm	w1118	Polalpha; Blmw1118	39	0.84375	0.156	32
Polalpha; Blm	w1118	Polalpha; Blmw1118	40	0.792453	0.208	53
Polalpha; Blm	w1118	Polalpha; Blmw1118	41	0.74	0.26	50
Polalpha; Blm	w1118	Polalpha; Blmw1118	42	0.709677	0.29	31
Polalpha; Blm	w1118	Polalpha; Blmw1118	43	0.732143	0.268	56
Polalpha; Blm	w1118	Polalpha; Blmw1118	44	0.722222	0.278	36
Polalpha; Blm	w1118	Polalpha; Blmw1118	45	0.677419	0.323	31
Polalpha; Blm	w1118	Polalpha; Blmw1118	46	0.75	0.25	56
Polalpha; Blm	C(1;Y)6	Polalpha; BlmC(1;Y)6	1	0.0188679	0.981132	53
Polalpha; Blm	C(1;Y)6	Polalpha; BlmC(1;Y)6	2	0.016129	0.983871	62
Polalpha; Blm	C(1;Y)6	Polalpha; BlmC(1;Y)6	3	0.0153846	0.984615	65
Polalpha; Blm	C(1;Y)6	Polalpha; BlmC(1;Y)6	4	0	1	61
Polalpha; Blm	C(1;Y)6	Polalpha; BlmC(1;Y)6	5	0.0169492	0.983051	59
Polalpha; Blm	C(1;Y)6	Polalpha; BlmC(1;Y)6	6	0.0140845	0.985915	71
Polalpha; Blm	C(1;Y)6	Polalpha; BlmC(1;Y)6	7	0.0243902	0.97561	82
Polalpha; Blm	C(1;Y)6	Polalpha; BlmC(1;Y)6	8	0.0547945	0.945205	73
Polalpha; Blm	C(1;Y)6	Polalpha; BlmC(1;Y)6	9	0.0178571	0.982143	56
Polalpha; Blm	C(1;Y)6	Polalpha; BlmC(1;Y)6	10	0.047619	0.952381	63
Polalpha; Blm	C(1;Y)6	Polalpha; BlmC(1;Y)6	11	0.0140845	0.985915	71
Polalpha; Blm	C(1;Y)6	Polalpha; BlmC(1;Y)6	12	0.010101	0.989899	99
Polalpha; Blm	C(1;Y)6	Polalpha; BlmC(1;Y)6	13	0.0344828	0.965517	58
Polalpha; Blm	C(1;Y)6	Polalpha; BlmC(1;Y)6	14	0	1	41
Polalpha; Blm	C(1;Y)6	Polalpha; BlmC(1;Y)6	15	0.0117647	0.988235	85
Polalpha; Blm	C(1;Y)6	Polalpha; BlmC(1;Y)6	16	0	1	58
Polalpha; Blm	C(1;Y)6	Polalpha; BlmC(1;Y)6	17	0.025	0.975	80
Polalpha; Blm	C(1;Y)6	Polalpha; BlmC(1;Y)6	18	0.0192308	0.980769	52
Polalpha; Blm	C(1;Y)6	Polalpha; BlmC(1;Y)6	19	0.0246914	0.975309	81
Polalpha; Blm	C(1;Y)6	Polalpha; BlmC(1;Y)6	20	0.0140845	0.985915	71
Polalpha; Blm	C(1;Y)6	Polalpha; BlmC(1;Y)6	21	0.037037	0.962963	108
Polalpha; Blm	C(1;Y)6	Polalpha; BlmC(1;Y)6	22	0.010989	0.989011	91
Polalpha; Blm	C(1;Y)6	Polalpha; BlmC(1;Y)6	23	0.0421053	0.957895	95
Polalpha; Blm	C(1;Y)6	Polalpha; BlmC(1;Y)6	24	0	1	44
Polalpha; Blm	C(1;Y)6	Polalpha; BlmC(1;Y)6	25	0.0252101	0.97479	119
Polalpha; Blm	C(1;Y)6	Polalpha; BlmC(1;Y)6	26	0.0337079	0.966292	89
Polalpha; Blm	C(1;Y)6	Polalpha; BlmC(1;Y)6	27	0	1	87
Polalpha; Blm	C(1;Y)6	Polalpha; BlmC(1;Y)6	28	0.00877193	0.991228	114
Polalpha; Blm	C(1;Y)6	Polalpha; BlmC(1;Y)6	29	0	1	79
Polalpha; Blm	C(1;Y)6	Polalpha; BlmC(1;Y)6	30	0.0208333	0.979167	96
Polalpha; Blm	C(1;Y)6	Polalpha; BlmC(1;Y)6	31	0.0105263	0.989474	95
Polalpha; Blm	C(1;Y)6	Polalpha; BlmC(1;Y)6	32	0.0447761	0.955224	67
Polalpha; Blm	C(1;Y)6	Polalpha; BlmC(1;Y)6	33	0.0108696	0.98913	92
Polalpha; Blm	C(1;Y)6	Polalpha; BlmC(1;Y)6	34	0	1	30
Polalpha; Blm	C(1;Y)6	Polalpha; BlmC(1;Y)6	35	0	1	23
Polalpha; Blm	C(1;Y)6	Polalpha; BlmC(1;Y)6	36	0.0454545	0.954545	22
Polalpha; Blm	C(1;Y)6	Polalpha; BlmC(1;Y)6	37	0	1	10
Polalpha; Blm	C(1;Y)6	Polalpha; BlmC(1;Y)6	38	0.010101	0.989899	99
Polalpha; Blm	C(1;Y)6	Polalpha; BlmC(1;Y)6	39	0.025	0.975	40
Polalpha; Blm	C(1;Y)6	Polalpha; BlmC(1;Y)6	40	0	1	19
Polalpha; Blm	C(1;Y)6	Polalpha; BlmC(1;Y)6	41	0.0454545	0.954545	44
Polalpha; Blm	C(1;Y)6	Polalpha; BlmC(1;Y)6	42	0.0285714	0.971429	35
Polalpha; Blm	C(1;Y)6	Polalpha; BlmC(1;Y)6	43	0.0625	0.9375	32
Polalpha; Blm	C(1;Y)6	Polalpha; BlmC(1;Y)6	44	0	1	24
Polalpha; Blm	C(1;Y)6	Polalpha; BlmC(1;Y)6	45	0	1	34
